# Supplementary material for: Human milk oligosaccharide 2’-fucosyllactose protects against high-fat diet-induced obesity by changing intestinal mucus production, composition and degradation linked to changes in gut microbiota and faecal proteome profiles in mice
Source: HighWire-hosted journal article supplement (doi:10.1136/gutjnl-2023-330301), 2024-05-13
Supplement: gutjnl-2023-330301supp011_data_supplement.pdf [file gutjnl-2023-330301supp011_data_supplement.pdf]

Supplemental table 9: primers sequences used for the RT-qPCR

| Primers            | Forward sequence            | Reverse sequence            |
|--------------------|-----------------------------|-----------------------------|
| <i>RPL19</i>       | GAAGGTCAAAGGGAATGTGTTCA     | CCTGTTGCTCACTTGT            |
| <i>Lyz1</i>        | GCCAAGGTCTACAATCGTTGTGAGTTG | CAGTCAGCCAGCTTGACACCACG     |
| <i>Reg3g</i>       | CATCCACCTCTGTTGGGTTC        | TTCTGTCTCCATGATCAAA         |
| <i>Pla2g2a</i>     | AAGGATCCCCAAGGATGCCAC       | CAGCCGTTTCTGACAGGAGTTCTGG   |
| <i>Intectin</i>    | GCACTATTGCAGAGGTCCGT        | GTTGCCCTGATTCTGCTGG         |
| <i>Tff3</i>        | CCCTGGTGCTTCAAACCTCT        | GGGATGCTTGCTACCCTTG         |
| <i>Proglucagon</i> | TGGCAGCACGCCCTTC            | GCGCTTCTGTCTGGGA            |
| <i>Math1</i>       | CAAGTGTGTCCAGCAGTGTG        | TTGAGTTTCTTCAAGGCGGC        |
| <i>Spdef</i>       | AGGTGCAATCGATGTTGTG         | AGGGTCTGCTGTGATGTTCA        |
| <i>Elf3</i>        | CCTATGAGAAGCTGAGCCGA        | ACCTCTTCTTCTCCAGCC          |
| <i>Klf4</i>        | GTGCCCCGACTAACGTTG          | GTCGTTGAACTCCTCGTCT         |
| <i>Hes1</i>        | CCGGCATTCCAAGCTAGAGA        | GGTATTTCCCAACACGCTC         |
| <i>Agr2</i>        | GCCAAAGACACCACAGTCAA        | CCATCAAGGGTCTGTTGCTT        |
| <i>Muc1</i>        | GACATCTTTCCAACCCAGGACA      | AAGAGAGACTGCTACTGCCATTAC    |
| <i>Muc2</i>        | ATGCCACCTCTCAAAGAC          | GTAGTTTCCGTTGGAACAGTGAA     |
| <i>Muc4</i>        | CTGTGTCTGAGCTGCCTGTATT      | GGGTGTCTGTGTTGATGTTGTTG     |
| <i>Muc13</i>       | CCCTCATCCTCATTTGCTGATT      | CTCTGCTCTTCCATCCTTCTTT      |
| <i>Muc17</i>       | CCGACACATTGCTGCTGAGAAT      | GCTGTCTGCTTGGGTGCTATTT      |
| <i>Gcnt1</i>       | ACAGATTCAGGCTTCTGTGATT      | GCCAGGTGAGATGCCAGTTTA       |
| <i>Gcnt4</i>       | ATGCTCTGCAGTTCATTGAGG       | ATGCTCTGCAGTTCATTGAGG       |
| <i>B3gnt6</i>      | GGCCAGATTCTCCTCTCTCAAAC     | CAGTGTCTGCGGACTCTTGAAC      |
| <i>C1gal1</i>      | ATGGACACAGTCACCTCAAAGG      | GAGGTTCTCAGCAACGCTATGT      |
| <i>C1gal1c1</i>    | TCTCACGTCCAAGCCTCGT         | TGTGGCCTAGCATAGTGATCAAG     |
| <i>Fut1</i>        | AGAATTCGCTTGACACCACA        | AAGAAGGAGCCGGCAGAGA         |
| <i>Fut2</i>        | TGAACCTTTCGGCTAAGGTACATCT   | GGAAGTGGGCCAGAGGAAAG        |
| <i>Fut8</i>        | AGGCGAATGGCTGAGTCTCT        | TGGCCTTAACAAGCTGTTCTTCT     |
| <i>St3gal1</i>     | GCCCACTATGCCAGACTT          | TCAGCAGAGTCAAACCCAGC        |
| <i>St3gal3</i>     | TGCTGCGGTCATGTAGGAAA        | CAGCGGAGTCAAGGGAAAGA        |
| <i>St3gal4</i>     | GGCTCTGGTCTTGTGTTG          | TCCCTAGAACGGTTGCCAAA        |
| <i>St3gal6</i>     | CACCCAAAAGCGCAGATTTATT      | CCTGCCTGAAACAGAGTCCAA       |
| <i>St6galnac2</i>  | CGGATGTTGTTGCTCGTTGC        | AGTCGGCTCTTCTGTTTTCC        |
| <i>Retnlb</i>      | CAAGGAAGCTCTCAGTCGTCAA      | CACTAGTGCAGGAGATCGTCTTAG    |
| <i>Atg5</i>        | ATGGTTTGAATATGAAGGCACACC    | TGATGTTCCAAGGAAGAGCTGAA     |
| <i>Atg7</i>        | CTTCTGAGAGCATCCCTTAATC      | CGGCTCGACACAGATCATCATAG     |
| <i>Nlrp6</i>       | CCCGAAATGTCATCTGAGTGTCT     | TTCAGGGCCTCGGAAAGGT         |
| <i>Fcgbp</i>       | AACTTTGCCACTGACCTG          | CCACAGCCTCCCTGCACT          |
| <i>Daglb</i>       | CTCCACCAGCAACAAGACAA        | GCAGTTCTCCACTTCTGCATC       |
| <i>Dagla</i>       | CCCTCAAGTGCTTCGCTTAC        | GTCCTTGCCAGAACCACA          |
| <i>Napepld</i>     | TTCTTTGCTGGGGATACTGG        | GCAAGGTCAAAGGACCAAA         |
| <i>Abdh4</i>       | GCACAGGGAAGAAGGTGAAG        | AGCATAGACGTGGTGGGATG        |
| <i>Nat1</i>        | CCCCGAGTTATCGAGGATTT        | CTGCAAGGAACAGAACGATG        |
| <i>Naaa</i>        | ATTATGACCATTGGAAGCTTCA      | CGCTCATCACTGTAGTATAAATTGTAG |
| <i>Faah</i>        | GTGAGGATTTGTTCCGCTTG        | GGAGTGGGCATGGTGTAGTT        |
| <i>Mgl</i>         | ATGGTCTGATTTCACTCTGGT       | TCAACCTCCGACTTGTCCGAGACA    |
| <i>Abdh6</i>       | CTGTCCATAGTGGGGCAAGT        | TCAGATGGGTAGTAAGCGGC        |
| <i>Cb1</i>         | CTGATGTTCTGGATCGGAGTC       | TCTGAGGTGTGAATGATGATGC      |
| <i>Cb2</i>         | CTGTGCTGCTCATATGCTGG        | GCAGAGCGAATCTCTCCACT        |
| <i>Gpr119</i>      | AGCTCTGCTCAGCATAACAG        | AAATGCCATCCGAAGGCTAC        |
| <i>Pparg</i>       | CTGCTCAAGTATGGTGTCCATGA     | TGAGATGAGGACTCCATCTTTATCA   |
