# Supplementary material for: Human milk oligosaccharide 2’-fucosyllactose protects against high-fat diet-induced obesity by changing intestinal mucus production, composition and degradation linked to changes in gut microbiota and faecal proteome profiles in mice
Source: Gut. 2024 May 13;73(10):1632–49. doi: 10.1136/gutjnl-2023-330301 (PMC11420753; doi:10.1136/gutjnl-2023-330301)
Supplement: Supplementary data [file gutjnl-2023-330301supp003.xlsx]

## Sheet: Faeces
FAECES
	RELATIVE ABUNDANCE						ABSOLUTE ABUNDANCE
	BEFORE THE TREATMENT			AFTER THE TREATMENT			BEFORE THE TREATMENT			AFTER THE TREATMENT
FAECES - Genus	CT	HFD	HFD+2FL	CT	HFD	HFD+2FL	CT	HFD	HFD+2FL	CT	HFD	HFD+2FL
Bacteroidota_Bacteroidia_Bacteroidales_Bacteroidaceae_Bacteroides	3.12516	3.22565	2.82124	1.68304	3.00181	37.0913	9.46702e+10	6.92719e+10	4.36932e+10	2.66795e+10	1.95769e+10	5.86422e+11
Bacteroidota_Bacteroidia_Bacteroidales_Marinifilaceae_Odoribacter	2.72224	3.05547	3.15942	4.58785	1.31485	1.1534	7.81903e+10	6.04875e+10	4.47971e+10	7.49015e+10	9.8757e+09	3.47847e+10
Bacteroidota_Bacteroidia_Bacteroidales_Muribaculaceae_Muribaculaceae	13.7161	13.4737	13.8111	8.22494	3.68202	2.37007	4.23216e+11	2.75225e+11	2.02568e+11	1.20899e+11	2.54922e+10	3.6925e+10
Bacteroidota_Bacteroidia_Bacteroidales_Prevotellaceae_Alloprevotella	1.72265	2.82986	3.58938		1.84365		4.36689e+10	5.35491e+10	5.21175e+10		1.09716e+10
Bacteroidota_Bacteroidia_Bacteroidales_Rikenellaceae_Alistipes	5.34047	7.40937	7.25131	7.39993	9.4454	5.30095	1.64484e+11	1.54838e+11	1.09148e+11	1.13878e+11	7.4178e+10	8.97671e+10
Bacteroidota_Bacteroidia_Bacteroidales_Rikenellaceae_Rikenellaceae.RC9.gut.group	6.40372	11.023	9.01113	17.3257	6.4848	2.43322	1.97942e+11	1.90847e+11	1.29498e+11	2.64421e+11	4.83745e+10	4.06189e+10
Bacteroidota_Bacteroidia_Bacteroidales_Tannerellaceae_unclassified1	10.595	11.1011	8.28515	2.07633			3.24048e+11	2.33964e+11	1.43449e+11	3.40414e+10
Cyanobacteria_Vampirivibrionia_Gastranaerophilales_Gastranaerophilales_Gastranaerophilales		1.48367	1.35717			1.47828		3.11183e+10	1.77033e+10			1.37915e+10
Desulfobacterota_Desulfovibrionia_Desulfovibrionales_Desulfovibrionaceae_uncultured1	26.1202	16.7025	16.4511	19.4111	38.7996	8.29931	9.19437e+11	3.46093e+11	3.05807e+11	3.65891e+11	3.4979e+11	2.65167e+11
Firmicutes_Bacilli_Erysipelotrichales_Erysipelotrichaceae_Faecalibaculum	2.83011	2.77134	3.59072	7.17077	3.01098	1.05919	6.26141e+10	5.3301e+10	5.36855e+10	1.08147e+11	1.01006e+10	1.2835e+10
Firmicutes_Clostridia_Lachnospirales_Lachnospiraceae_Lachnospiraceae.NK4A136.group	2.89763	1.70618	1.2463	1.09467	3.1655		9.18529e+10	2.96235e+10	2.05999e+10	1.70143e+10	2.356e+10
Firmicutes_Clostridia_Lachnospirales_Lachnospiraceae_unclassified3	1.09044		1.00458		1.34068		3.49669e+10		1.74845e+10		1.05424e+10
Firmicutes_Clostridia_Oscillospirales_Oscillospiraceae_Colidextribacter					2.2163						1.62966e+10
Firmicutes_Clostridia_Oscillospirales_Oscillospiraceae_Oscillibacter					2.29394						1.73919e+10
Firmicutes_Clostridia_Oscillospirales_Oscillospiraceae_unclassified2	1.3954				2.09523		4.68434e+10				1.40968e+10
Firmicutes_Clostridia_Oscillospirales_Oscillospiraceae_uncultured2	1.43625	1.00702		2.28935	6.7022		4.50852e+10	1.84428e+10		4.09119e+10	5.2267e+10
Firmicutes_Clostridia_Oscillospirales_Ruminococcaceae_uncultured5					1.6787						1.48545e+10
Proteobacteria_Alphaproteobacteria_Rhodospirillales_uncultured3_uncultured3			1.3415						2.13264e+10
Proteobacteria_Gammaproteobacteria_Burkholderiales_Sutterellaceae_Parasutterella						3.53157						3.98006e+10
Verrucomicrobiota_Verrucomicrobiae_Verrucomicrobiales_Akkermansiaceae_Akkermansia	12.4559	15.1549	18.4907	18.4319	5.32027	29.8003	3.50339e+11	3.01114e+11	2.16589e+11	1.99156e+11	4.83028e+10	3.92267e+11
Others (<1%)	8.14862	9.05637	8.58926	10.3044	7.6041	7.48242	2.52642e+11	1.72124e+11	1.42612e+11	1.64839e+11	5.28345e+10	1.21862e+11
	RELATIVE ABUNDANCE						ABSOLUTE ABUNDANCE
	BEFORE THE TREATMENT			AFTER THE TREATMENT			BEFORE THE TREATMENT			AFTER THE TREATMENT
FAECES - Phylum	CT	HFD	HFD+2FL	CT	HFD	HFD+2FL	CT	HFD	HFD+2FL	CT	HFD	HFD+2FL
Actinobacteriota (<1%)	0.000170207	0.000246689	0.000258355	0.000751196	0.000515974	0.00107611	4.15448e+08	4.73844e+08	3.9507e+08	1.18502e+09	2.75172e+08	1.8692e+09
Bacteroidota	0.437627	0.522964	0.481279	0.424192	0.259104	0.497325	1.32981e+12	1.0418e+12	7.2844e+11	6.51399e+11	1.89354e+11	8.11542e+11
Campilobacterota (<1%)	2.5724e-06	1.08674e-06	9.24346e-07	0	1.35426e-06	6.11946e-07	9.38643e+06	1.14751e+06	1.43779e+06	0	1.75756e+06	2.69653e+06
Cyanobacteria	0.0095796	0.0148367	0.0135717	0.00292631	0.000120529	0.0147828	2.89391e+10	3.11183e+10	1.77033e+10	3.79848e+09	1.17495e+08	1.37915e+10
Desulfobacterota	0.261481	0.167312	0.164683	0.194462	0.388845	0.0833153	9.2035e+11	3.46636e+11	3.06147e+11	3.66564e+11	3.50571e+11	2.65906e+11
Firmicutes	0.158005	0.133981	0.133981	0.181188	0.296386	0.0684961	4.79058e+11	2.50657e+11	2.19521e+11	2.91687e+11	2.08697e+11	1.05933e+11
Proteobacteria	0.00857508	0.00911065	0.0213191	0.0121601	0.00182464	0.0370016	2.50826e+10	2.00309e+10	3.22823e+10	1.69895e+10	1.18714e+09	4.29301e+10
Verrucomicrobiota	0.124559	0.151549	0.184907	0.184319	0.0532027	0.298003	3.50339e+11	3.01114e+11	2.16589e+11	1.99156e+11	4.83028e+10	3.92267e+11
