# Supplementary material for: Human milk oligosaccharide 2’-fucosyllactose protects against high-fat diet-induced obesity by changing intestinal mucus production, composition and degradation linked to changes in gut microbiota and faecal proteome profiles in mice
Source: Gut. 2024 May 13;73(10):1632–49. doi: 10.1136/gutjnl-2023-330301 (PMC11420753; doi:10.1136/gutjnl-2023-330301)
Supplement: Supplementary data [file gutjnl-2023-330301supp005.xlsx]

## Sheet: Relative Abundance
Genera enriched or depleted following the dietary treatment
FAECES
RELATIVE ABUNDANCE
Taxonomy	CT	HFD	HFD vs CT					CT	HFD+2'FL	HFD+2'FL vs CT					HFD	HFD+2'FL	HFD+2'FL vs HFD
	Mean	Mean	changes (%)	P-value	p_FDR	model	FoldChange	Mean	Mean	changes (%)	P-value	p_FDR	model	FoldChange	Mean	Mean	changes (%)	P-value	p_FDR	model	FoldChange
Actinobacteriota_Coriobacteriia_Coriobacteriales_Atopobiaceae_Coriobacteriaceae.UCG.002	0.00070283	0.000234115	-66.6897	0.0796332	0.132694	MASS::glm.nb	0.333103	0.00070283	0.000883249	25.6704	0.707684	0.76585	MASS::glm.nb	1.2567	0.000234115	0.000883249	277.272	0.0341987	0.0500314	MASS::glm.nb	3.77272
Actinobacteriota_Coriobacteriia_Coriobacteriales_Eggerthellaceae_Enterorhabdus	4.96023e-05	0.000271667	447.69	9.29229e-05	0.000438317	log nlme::gls	5.4769	4.96023e-05	0.000172505	247.777	0.646333	0.709171	log nlme::gls	3.47777	0.000271667	0.000172505	-36.5011	0.00963271	0.0181187	log nlme::gls	0.634989
Bacteroidota_Bacteroidia_Bacteroidales_Bacteroidaceae_Bacteroides	0.0167547	0.0307141	83.3158	0.301308	0.371953	log nlme::gls	1.83316	0.0167547	0.357499	2033.72	2.2582e-07	3.56796e-06	log nlme::gls	21.3372	0.0307141	0.357499	1063.96	4.65521e-05	0.00017058	log nlme::gls	11.6396
Bacteroidota_Bacteroidia_Bacteroidales_Marinifilaceae_Odoribacter	0.0475809	0.0133464	-71.9501	3.77532e-05	0.000248542	log nlme::gls	0.280499	0.0475809	0.0124042	-73.9303	0.00238642	0.00725104	log nlme::gls	0.260697	0.0133464	0.0124042	-7.05947	0.0214346	0.0338666	log nlme::gls	0.929405
Bacteroidota_Bacteroidia_Bacteroidales_Muribaculaceae_Muribaculaceae	0.0834081	0.0367463	-55.944	7.17207e-06	8.09419e-05	nlme::gls	0.44056	0.0834081	0.0256413	-69.258	5.16299e-07	6.43604e-06	nlme::gls	0.30742	0.0367463	0.0256413	-30.2207	0.169757	0.209544	nlme::gls	0.697793
Bacteroidota_Bacteroidia_Bacteroidales_Muribaculaceae_Muribaculum	0.0022517	0.000577918	-74.3341	0.00450487	0.0101681	log nlme::gls	0.256659	0.0022517	0.00129	-42.71	0.0146485	0.0361635	log nlme::gls	0.5729	0.000577918	0.00129	123.215	0.111852	0.147271	log nlme::gls	2.23215
Bacteroidota_Bacteroidia_Bacteroidales_Prevotellaceae_Alloprevotella	0.00855021	0.0154754	80.9942	0.504949	0.604408	MASS::glm.nb	1.80994	0.00855021	0.00469084	-45.1377	0.488209	0.57565	MASS::glm.nb	0.548623	0.0154754	0.00469084	-69.6884	0.179791	0.218515	MASS::glm.nb	0.303116
Bacteroidota_Bacteroidia_Bacteroidales_Prevotellaceae_Prevotellaceae.UCG.001	7.84322e-05	8.20844e-07	-98.9534	1.06246e-06	1.67868e-05	MASS::glm.nb	0.0104657	7.84322e-05	3.76372e-05	-52.013	0.194288	0.284236	MASS::glm.nb	0.47987	8.20844e-07	3.76372e-05	4485.19	4.75032e-05	0.00017058	MASS::glm.nb	45.8519
Bacteroidota_Bacteroidia_Bacteroidales_Rikenellaceae_Alistipes	0.0762495	0.0941856	23.5229	0.199844	0.267588	nlme::gls	1.23523	0.0762495	0.0617124	-19.0652	0.544111	0.622968	nlme::gls	0.809348	0.0941856	0.0617124	-34.4779	0.187414	0.22263	nlme::gls	0.655221
Bacteroidota_Bacteroidia_Bacteroidales_Rikenellaceae_Rikenellaceae.RC9.gut.group	0.169901	0.0652801	-61.5776	0.000165191	0.000686848	nlme::gls	0.384224	0.169901	0.0247174	-85.4519	5.70282e-07	6.43604e-06	nlme::gls	0.145481	0.0652801	0.0247174	-62.1365	0.00110489	0.00272771	nlme::gls	0.378635
Bacteroidota_Bacteroidia_Bacteroidales_Tannerellaceae_unclassified1	0.0220445	0.000819256	-96.2836	4.33393e-24	3.4238e-22	MASS::glm.nb	0.0371637	0.0220445	0.00828954	-62.3963	0.00195426	0.00671245	MASS::glm.nb	0.376037	0.000819256	0.00828954	911.838	1.11183e-12	4.39174e-11	MASS::glm.nb	10.1184
Cyanobacteria_Vampirivibrionia_Gastranaerophilales_Gastranaerophilales_Gastranaerophilales	0.00295311	0.000120687	-95.9132	0.000438742	0.00144419	MASS::glm.nb	0.0408676	0.00295311	0.00902151	205.491	0.206095	0.296028	MASS::glm.nb	3.05491	0.000120687	0.00902151	7375.15	2.09732e-06	1.10459e-05	MASS::glm.nb	74.7515
Desulfobacterota_Desulfovibrionia_Desulfovibrionales_Desulfovibrionaceae_Bilophila	0.000352719	0.00084441	139.4	0.00246631	0.00616075	nlme::gls	2.394	0.000352719	0.000368395	4.44453	0.926931	0.938815	nlme::gls	1.04445	0.00084441	0.000368395	-56.3725	0.0125745	0.0225769	nlme::gls	0.436275
Desulfobacterota_Desulfovibrionia_Desulfovibrionales_Desulfovibrionaceae_uncultured1	0.198446	0.386594	94.8109	0.247429	0.320441	MASS::glm.nb	1.94811	0.198446	0.0838557	-57.7438	0.124784	0.20534	MASS::glm.nb	0.422562	0.386594	0.0838557	-78.3091	0.00803312	0.0154784	MASS::glm.nb	0.216909
Firmicutes_Bacilli_Erysipelotrichales_Erysipelatoclostridiaceae_Erysipelatoclostridium	0.000130613	0.000162941	24.7516	0.703331	0.750853	MASS::glm.nb	1.24752	0.000130613	8.20108e-05	-37.2107	0.401568	0.511675	MASS::glm.nb	0.627893	0.000162941	8.20108e-05	-49.6686	0.333173	0.365564	log nlme::gls	0.503314
Firmicutes_Bacilli_Erysipelotrichales_Erysipelotrichaceae_Dubosiella	0.00236846	0.00254705	7.5401	0.920248	0.932046	MASS::glm.nb	1.0754	0.00236846	0.000432031	-81.759	0.0161752	0.0365097	MASS::glm.nb	0.18241	0.00254705	0.000432031	-83.038	0.0146476	0.0251556	MASS::glm.nb	0.16962
Firmicutes_Bacilli_Erysipelotrichales_Erysipelotrichaceae_Faecalibaculum	0.0661572	0.029448	-55.4879	0.0508807	0.0934785	MASS::glm.nb	0.445121	0.0661572	0.0117066	-82.3049	1.76987e-05	0.000123632	MASS::glm.nb	0.176951	0.029448	0.0117066	-60.2465	0.0260694	0.0396054	MASS::glm.nb	0.397535
Firmicutes_Bacilli_Lactobacillales_Lactobacillaceae_Lactobacillus	0.00181882	0.00612905	236.979	0.00641829	0.0140846	MASS::glm.nb	3.36979	0.00181882	0.00179848	-1.11846	0.978892	0.978892	MASS::glm.nb	0.988815	0.00612905	0.00179848	-70.6565	0.00592793	0.0120079	MASS::glm.nb	0.293435
Firmicutes_Bacilli_Lactobacillales_Streptococcaceae_Lactococcus	0.000331879	0.00144036	334	1.94142e-05	0.000139429	MASS::glm.nb	4.34	0.000331879	0.000259217	-21.894	0.455954	0.55416	MASS::glm.nb	0.78106	0.00144036	0.000259217	-82.0032	5.7014e-07	4.50411e-06	MASS::glm.nb	0.179968
Firmicutes_Bacilli_RF39_RF39_RF39	0.00103767	0.00122243	17.8048	0.6346	0.716191	nlme::gls	1.17805	0.00103767	0.000270839	-73.8994	0.0155813	0.0365097	nlme::gls	0.261006	0.00122243	0.000270839	-77.8442	0.02832	0.0422128	nlme::gls	0.221558
Firmicutes_Clostridia_Christensenellales_Christensenellaceae_Christensenellaceae.R.7.group	3.82362e-05	7.94146e-05	107.695	0.0860382	0.133275	log nlme::gls	2.07695	3.82362e-05	1.74085e-05	-54.4713	0.127363	0.20534	log nlme::gls	0.455287	7.94146e-05	1.74085e-05	-78.079	0.00202754	0.00480346	log nlme::gls	0.21921
Firmicutes_Clostridia_Christensenellales_Christensenellaceae_uncultured7	0.000270711	0.000214567	-20.7396	0.301329	0.371953	nlme::gls	0.792604	0.000270711	2.8668e-06	-98.941	8.23677e-08	1.65911e-06	nlme::gls	0.0105899	0.000214567	2.8668e-06	-98.6639	1.06696e-05	4.68278e-05	nlme::gls	0.0133609
Firmicutes_Clostridia_Clostridia_Hungateiclostridiaceae_Ruminiclostridium	0.000150722	2.15788e-05	-85.683	6.1236e-06	8.06275e-05	log nlme::gls	0.14317	0.000150722	0	-100	1.25985e-20	9.95281e-19	log nlme::gls	0	2.15788e-05	0	-100	0.0167612	0.0275861	log nlme::gls	0
Firmicutes_Clostridia_Clostridia.UCG.014_Clostridia.UCG.014_Clostridia.UCG.014	0.00115469	0.000341059	-70.4631	0.0831422	0.133031	MASS::glm.nb	0.295369	0.00115469	0.00107238	-7.12812	0.913724	0.937457	MASS::glm.nb	0.928719	0.000341059	0.00107238	214.426	0.103631	0.141153	MASS::glm.nb	3.14426
Firmicutes_Clostridia_Clostridia.vadinBB60.group_Clostridia.vadinBB60.group_Clostridia.vadinBB60.group	0.00690737	0.00103561	-85.0072	1.44313e-05	0.000126675	log nlme::gls	0.149928	0.00690737	0.000414193	-94.0036	3.5172e-06	3.08732e-05	log nlme::gls	0.0599639	0.00103561	0.000414193	-60.0048	0.00575601	0.0119664	log nlme::gls	0.399952
Firmicutes_Clostridia_Clostridiales_Clostridiaceae_Clostridium.sensu.stricto.1	0	0.000689822		0.000464088	0.00146652	log nlme::gls	Inf	0	0		0.0119313	0.0304056	log nlme::gls	NA	0.000689822	0	-100	0.000203384	0.000669472	log nlme::gls	0
Firmicutes_Clostridia_Lachnospirales_Lachnospiraceae_.Eubacterium..xylanophilum.group	3.78706e-05	4.13164e-05	9.09899	0.904515	0.928008	MASS::glm.nb	1.09099	3.78706e-05	7.16263e-06	-81.0866	0.0245607	0.0524405	MASS::glm.nb	0.189134	4.13164e-05	7.16263e-06	-82.664	0.0208161	0.0335606	MASS::glm.nb	0.17336
Firmicutes_Clostridia_Lachnospirales_Lachnospiraceae_A2	0.000895763	0.00106456	18.8437	0.667892	0.734404	MASS::glm.nb	1.18844	0.000895763	0.000164176	-81.6719	1.55929e-05	0.000123184	MASS::glm.nb	0.183281	0.00106456	0.000164176	-84.578	3.58079e-06	1.76802e-05	MASS::glm.nb	0.15422
Firmicutes_Clostridia_Lachnospirales_Lachnospiraceae_Acetatifactor	0.000244896	0.000402545	64.3736	0.541273	0.638218	MASS::glm.nb	1.64374	0.000244896	2.02777e-05	-91.7199	0.00184452	0.00662349	MASS::glm.nb	0.082801	0.000402545	2.02777e-05	-94.9626	0.00027356	0.00077183	MASS::glm.nb	0.0503737
Firmicutes_Clostridia_Lachnospirales_Lachnospiraceae_ASF356	0.000106991	6.60602e-05	-38.2561	0.701671	0.750853	MASS::glm.nb	0.617439	0.000106991	7.63592e-06	-92.863	0.0336303	0.0664199	MASS::glm.nb	0.07137	6.60602e-05	7.63592e-06	-88.441	0.0912198	0.126427	MASS::glm.nb	0.11559
Firmicutes_Clostridia_Lachnospirales_Lachnospiraceae_Blautia	0.00696905	0.00455642	-34.6192	0.0841968	0.133031	MASS::glm.nb	0.653808	0.00696905	0.00391166	-43.871	0.0158921	0.0365097	MASS::glm.nb	0.56129	0.00455642	0.00391166	-14.1507	0.535296	0.563846	MASS::glm.nb	0.858493
Firmicutes_Clostridia_Lachnospirales_Lachnospiraceae_Dorea	3.48636e-05	0.000134347	285.35	0.0132881	0.0269169	log nlme::gls	3.8535	3.48636e-05	2.91377e-05	-16.4238	0.157949	0.244666	log nlme::gls	0.835762	0.000134347	2.91377e-05	-78.3116	0.000397146	0.00108188	log nlme::gls	0.216884
Firmicutes_Clostridia_Lachnospirales_Lachnospiraceae_GCA.900066575	0.000705538	0.00196334	178.276	0.0259263	0.0499556	log nlme::gls	2.78276	0.000705538	0.00150646	113.52	0.302132	0.40455	log nlme::gls	2.1352	0.00196334	0.00150646	-23.2705	0.128838	0.166856	log nlme::gls	0.767295
Firmicutes_Clostridia_Lachnospirales_Lachnospiraceae_Lachnoclostridium	0.00214779	0.00534466	148.844	0.00135493	0.00356799	MASS::glm.nb	2.48844	0.00214779	0.00136322	-36.5292	0.100754	0.169352	MASS::glm.nb	0.634708	0.00534466	0.00136322	-74.4937	1.5702e-06	1.00832e-05	MASS::glm.nb	0.255063
Firmicutes_Clostridia_Lachnospirales_Lachnospiraceae_Lachnospiraceae.FCS020.group	0.000682906	0.000512508	-24.952	0.110119	0.161101	log nlme::gls	0.75048	0.000682906	0.000254983	-62.6621	0.00230043	0.00725104	log nlme::gls	0.373379	0.000512508	0.000254983	-50.248	0.282295	0.314103	log nlme::gls	0.49752
Firmicutes_Clostridia_Lachnospirales_Lachnospiraceae_Lachnospiraceae.NK4A136.group	0.0109414	0.0311115	184.348	7.77488e-05	0.000423451	log nlme::gls	2.84348	0.0109414	0.00224743	-79.4593	0.00050564	0.0021024	log nlme::gls	0.205407	0.0311115	0.00224743	-92.7762	3.02143e-07	2.65214e-06	log nlme::gls	0.0722379
Firmicutes_Clostridia_Lachnospirales_Lachnospiraceae_Lachnospiraceae.UCG.004	0.000108059	0.000537079	397.023	0.00249549	0.00616075	MASS::glm.nb	4.97023	0.000108059	7.71474e-05	-28.6064	0.514198	0.597377	MASS::glm.nb	0.713936	0.000537079	7.71474e-05	-85.6358	0.000250901	0.000734119	MASS::glm.nb	0.143642
Firmicutes_Clostridia_Lachnospirales_Lachnospiraceae_Lachnospiraceae.UCG.006	6.34265e-06	6.12963e-05	866.414	0.00836779	0.0173962	MASS::glm.nb	9.66414	6.34265e-06	0.00451883	71145.1	2.26613e-15	8.95122e-14	MASS::glm.nb	712.451	6.12963e-05	0.00451883	7272.11	1.16413e-07	1.3138e-06	MASS::glm.nb	73.7211
Firmicutes_Clostridia_Lachnospirales_Lachnospiraceae_Lachnospiraceae.UCG.010	2.02715e-05	1.67092e-05	-17.5728	0.800128	0.842801	MASS::glm.nb	0.824272	2.02715e-05	3.00401e-05	48.1889	0.634616	0.706122	MASS::glm.nb	1.48189	1.67092e-05	3.00401e-05	79.7816	0.473818	0.512762	MASS::glm.nb	1.79782
Firmicutes_Clostridia_Lachnospirales_Lachnospiraceae_Marvinbryantia	2.41394e-05	7.79485e-06	-67.7089	8.04021e-05	0.000423451	MASS::glm.nb	0.322911	2.41394e-05	2.16266e-05	-10.4092	0.443376	0.547292	MASS::glm.nb	0.895908	7.79485e-06	2.16266e-05	177.448	0.000473467	0.0012468	MASS::glm.nb	2.77448
Firmicutes_Clostridia_Lachnospirales_Lachnospiraceae_Roseburia	0.00154753	0.00267725	73.0016	0.0806242	0.132694	log nlme::gls	1.73002	0.00154753	0.00196149	26.7495	0.0897227	0.154089	log nlme::gls	1.26749	0.00267725	0.00196149	-26.7351	0.0132211	0.0232103	log nlme::gls	0.732649
Firmicutes_Clostridia_Lachnospirales_Lachnospiraceae_Tuzzerella	0.00157143	0.00719763	358.03	0.00084976	0.00239754	MASS::glm.nb	4.5803	0.00157143	0.000878406	-44.1015	0.190348	0.283726	MASS::glm.nb	0.558985	0.00719763	0.000878406	-87.7959	4.01428e-06	1.86546e-05	MASS::glm.nb	0.122041
Firmicutes_Clostridia_Lachnospirales_Lachnospiraceae_unclassified3	0.00524773	0.0132047	151.627	0.00258438	0.00617875	MASS::glm.nb	2.51627	0.00524773	0.00426695	-18.6897	0.488153	0.57565	MASS::glm.nb	0.813103	0.0132047	0.00426695	-67.6861	0.000225736	0.00068589	MASS::glm.nb	0.323139
Firmicutes_Clostridia_Lachnospirales_Lachnospiraceae_uncultured6	0.00194931	0.00914575	369.178	7.07842e-08	1.86398e-06	MASS::glm.nb	4.69178	0.00194931	0.0057634	195.663	0.000103523	0.000511144	MASS::glm.nb	2.95663	0.00914575	0.0057634	-36.9828	0.107046	0.143332	MASS::glm.nb	0.630172
Firmicutes_Clostridia_Monoglobales_Monoglobaceae_Monoglobus	3.4758e-05	2.87954e-06	-91.7155	0.000329831	0.0011329	nlme::gls	0.0828453	3.4758e-05	0	-100	8.65856e-05	0.000456018	nlme::gls	0	2.87954e-06	0	-100	0.0259793	0.0396054	nlme::gls	0
Firmicutes_Clostridia_Oscillospirales_.Eubacterium..coprostanoligenes.group_.Eubacterium..coprostanoligenes.group	0.000388788	0.00033449	-13.9658	0.565051	0.656457	nlme::gls	0.860342	0.000388788	0.000203165	-47.7441	0.0584118	0.104876	nlme::gls	0.522559	0.00033449	0.000203165	-39.2614	0.188813	0.22263	nlme::gls	0.607386
Firmicutes_Clostridia_Oscillospirales_Butyricicoccaceae_Butyricicoccus	0.000149091	0.000217013	45.5572	0.945713	0.945713	log nlme::gls	1.45557	0.000149091	8.76901e-06	-94.1184	2.94218e-05	0.000166023	log nlme::gls	0.0588163	0.000217013	8.76901e-06	-95.9592	0.0010087	0.00257055	log nlme::gls	0.0404077
Firmicutes_Clostridia_Oscillospirales_Butyricicoccaceae_UCG.009	0.00067207	0.000916195	36.3244	0.235751	0.310405	nlme::gls	1.36324	0.00067207	0.00014105	-79.0125	0.00308237	0.00901879	nlme::gls	0.209875	0.000916195	0.00014105	-84.6047	0.000175291	0.000602085	nlme::gls	0.153953
Firmicutes_Clostridia_Oscillospirales_Oscillospiraceae_Colidextribacter	0.00847384	0.021868	158.065	0.000204582	0.000769618	log nlme::gls	2.58065	0.00847384	0.00531326	-37.2981	0.0278025	0.0563179	log nlme::gls	0.627019	0.021868	0.00531326	-75.7031	1.40489e-05	5.8414e-05	log nlme::gls	0.242969
Firmicutes_Clostridia_Oscillospirales_Oscillospiraceae_Intestinimonas	0.000794699	0.0024285	205.587	0.00265921	0.00617875	log nlme::gls	3.05587	0.000794699	7.24928e-05	-90.878	1.18584e-06	1.17102e-05	log nlme::gls	0.0912204	0.0024285	7.24928e-05	-97.0149	3.84142e-08	5.05787e-07	log nlme::gls	0.0298509
Firmicutes_Clostridia_Oscillospirales_Oscillospiraceae_NK4A214.group	0.000574849	0.00044728	-22.1917	0.591687	0.677439	MASS::glm.nb	0.778083	0.000574849	0.000495424	-13.8167	0.742541	0.792713	MASS::glm.nb	0.861833	0.00044728	0.000495424	10.7636	0.828273	0.828273	MASS::glm.nb	1.10764
Firmicutes_Clostridia_Oscillospirales_Oscillospiraceae_Oscillibacter	0.00864646	0.0224394	159.521	0.000513416	0.00155999	log nlme::gls	2.59521	0.00864646	0.00537348	-37.8534	0.027039	0.0562126	log nlme::gls	0.621466	0.0224394	0.00537348	-76.0534	2.63826e-05	0.000104211	log nlme::gls	0.239466
Firmicutes_Clostridia_Oscillospirales_Oscillospiraceae_Oscillospira	2.29985e-05	1.72377e-05	-25.0486	NA	NA	NA	0.749514	2.29985e-05	0	-100	NA	NA	NA	0	1.72377e-05	0	-100	NA	NA	NA	0
Firmicutes_Clostridia_Oscillospirales_Oscillospiraceae_UCG.005	0.000199935	5.51444e-05	-72.4189	0.185715	0.252957	MASS::glm.nb	0.275811	0.000199935	3.30265e-05	-83.4814	0.0569457	0.104621	MASS::glm.nb	0.165186	5.51444e-05	3.30265e-05	-40.109	0.596372	0.619913	MASS::glm.nb	0.59891
Firmicutes_Clostridia_Oscillospirales_Oscillospiraceae_unclassified2	0.00937294	0.02073	121.169	0.00832253	0.0173962	nlme::gls	2.21169	0.00937294	0.0084583	-9.75826	0.848213	0.881695	nlme::gls	0.902417	0.02073	0.0084583	-59.1979	0.0431578	0.0619903	nlme::gls	0.408021
Firmicutes_Clostridia_Oscillospirales_Oscillospiraceae_uncultured2	0.0229011	0.066367	189.799	9.43214e-05	0.000438317	log nlme::gls	2.89799	0.0229011	0.0040491	-82.3191	2.68885e-05	0.000163399	log nlme::gls	0.176809	0.066367	0.0040491	-93.8989	1.7497e-08	2.76452e-07	log nlme::gls	0.0610108
Firmicutes_Clostridia_Oscillospirales_Oscillospirales_Hydrogenoanaerobacterium	6.18193e-06	2.15494e-05	248.587	0.0723496	0.124253	log nlme::gls	3.48587	6.18193e-06	0	-100	0.00629045	0.0171361	log nlme::gls	0	2.15494e-05	0	-100	0.0023869	0.00538757	log nlme::gls	0
Firmicutes_Clostridia_Oscillospirales_Ruminococcaceae_Anaerotruncus	0.00164713	0.00575059	249.127	7.01958e-05	0.000423451	MASS::glm.nb	3.49127	0.00164713	0.000514186	-68.783	0.000146403	0.000680344	MASS::glm.nb	0.31217	0.00575059	0.000514186	-91.0585	1.74342e-14	1.3773e-12	MASS::glm.nb	0.0894145
Firmicutes_Clostridia_Oscillospirales_Ruminococcaceae_Candidatus.Soleaferrea	6.53064e-06	2.80889e-05	330.109	0.184822	0.252957	MASS::glm.nb	4.30109	6.53064e-06	1.79914e-06	-72.4508	0.256233	0.361471	MASS::glm.nb	0.275492	2.80889e-05	1.79914e-06	-93.5948	0.0164434	0.0275861	MASS::glm.nb	0.0640517
Firmicutes_Clostridia_Oscillospirales_Ruminococcaceae_Caproiciproducens	1.92004e-05	2.87733e-06	-85.0142	0.0939543	0.142738	MASS::glm.nb	0.149858	1.92004e-05	1.12912e-05	-41.193	0.609228	0.687557	MASS::glm.nb	0.58807	2.87733e-06	1.12912e-05	292.419	0.230405	0.267677	MASS::glm.nb	3.92419
Firmicutes_Clostridia_Oscillospirales_Ruminococcaceae_Harryflintia	0.000175809	0.000441287	151.004	0.000196045	0.000769618	nlme::gls	2.51004	0.000175809	0.000295261	67.9444	0.364253	0.471738	nlme::gls	1.67944	0.000441287	0.000295261	-33.0909	0.278114	0.313871	nlme::gls	0.669091
Firmicutes_Clostridia_Oscillospirales_Ruminococcaceae_Incertae_Sedis	0.00114494	0.00181765	58.7558	0.120226	0.172689	nlme::gls	1.58756	0.00114494	0.000494419	-56.8169	0.0396328	0.0763656	nlme::gls	0.431831	0.00181765	0.000494419	-72.799	0.00206731	0.00480346	nlme::gls	0.27201
Firmicutes_Clostridia_Oscillospirales_Ruminococcaceae_Paludicola	3.84367e-05	3.82467e-05	-0.494324	0.89468	0.928008	log nlme::gls	0.995057	3.84367e-05	0	-100	0.00450802	0.012719	log nlme::gls	0	3.82467e-05	0	-100	0.00451771	0.00964592	log nlme::gls	0
Firmicutes_Clostridia_Oscillospirales_Ruminococcaceae_UBA1819	0.000581914	0.000311859	-46.4081	0.181302	0.252957	log nlme::gls	0.535919	0.000581914	0.000152344	-73.8201	0.000765965	0.00302556	log nlme::gls	0.261799	0.000311859	0.000152344	-51.1496	0.0033645	0.00738321	log nlme::gls	0.488504
Firmicutes_Clostridia_Oscillospirales_Ruminococcaceae_unclassified4	0.000331881	0.000409601	23.4182	0.291588	0.37154	nlme::gls	1.23418	0.000331881	0.000165198	-50.2238	0.0566419	0.104621	nlme::gls	0.497762	0.000409601	0.000165198	-59.6687	0.00622669	0.0122977	nlme::gls	0.403313
Firmicutes_Clostridia_Oscillospirales_Ruminococcaceae_uncultured5	0.00411812	0.0166481	304.264	5.1916e-07	1.02534e-05	log nlme::gls	4.04264	0.00411812	0.00133527	-67.5757	0.000237677	0.00104314	log nlme::gls	0.324243	0.0166481	0.00133527	-91.9794	4.85042e-09	9.57957e-08	log nlme::gls	0.0802057
Firmicutes_Clostridia_Oscillospirales_UCG.010_UCG.010	0.000118959	0.000190702	60.309	0.0689093	0.120974	nlme::gls	1.60309	0.000118959	0.000109799	-7.69994	0.799238	0.841864	nlme::gls	0.923001	0.000190702	0.000109799	-42.4237	0.132832	0.169254	nlme::gls	0.575763
Firmicutes_Clostridia_Oscillospirales_unclassified6_unclassified6	3.32435e-05	2.26862e-05	-31.7576	0.107889	0.160815	MASS::glm.nb	0.682424	3.32435e-05	1.15255e-05	-65.3303	8.40055e-08	1.65911e-06	MASS::glm.nb	0.346697	2.26862e-05	1.15255e-05	-49.1962	0.267146	0.305863	MASS::glm.nb	0.508038
Firmicutes_Clostridia_Peptococcales_Peptococcaceae_Peptococcus	0.00060431	0.00286421	373.963	0.000150506	0.000660553	MASS::glm.nb	4.73963	0.00060431	0.00039342	-34.8976	0.282636	0.388932	MASS::glm.nb	0.651024	0.00286421	0.00039342	-86.2642	1.32078e-06	9.48558e-06	MASS::glm.nb	0.137358
Firmicutes_Clostridia_Peptococcales_Peptococcaceae_uncultured4	0.00121719	0.00150496	23.6419	0.419687	0.510082	log nlme::gls	1.23642	0.00121719	0.00372553	206.075	0.418252	0.524474	log nlme::gls	3.06075	0.00150496	0.00372553	147.55	0.707155	0.717932	log nlme::gls	2.4755
Firmicutes_Clostridia_Peptostreptococcales.Tissierellales_Anaerovoracaceae_.Eubacterium..brachy.group	8.05769e-06	1.4183e-05	76.0185	0.66933	0.734404	MASS::glm.nb	1.76019	8.05769e-06	1.19943e-06	-85.1145	0.17704	0.268964	MASS::glm.nb	0.148855	1.4183e-05	1.19943e-06	-91.5432	0.0835039	0.1178	MASS::glm.nb	0.0845677
Firmicutes_Clostridia_Peptostreptococcales.Tissierellales_Anaerovoracaceae_.Eubacterium..nodatum.group	4.43642e-05	0.000248987	461.235	0.000242916	0.000872288	log nlme::gls	5.61235	4.43642e-05	2.34953e-05	-47.0399	0.0778111	0.136602	log nlme::gls	0.529601	0.000248987	2.34953e-05	-90.5636	1.65927e-06	1.00832e-05	log nlme::gls	0.0943636
Firmicutes_Clostridia_Peptostreptococcales.Tissierellales_Anaerovoracaceae_Anaerovorax	0.000201009	0.000409448	103.696	0.0330292	0.0621263	log nlme::gls	2.03696	0.000201009	7.82076e-05	-61.0925	0.00793716	0.0209012	log nlme::gls	0.389075	0.000409448	7.82076e-05	-80.8993	0.000219482	0.00068589	log nlme::gls	0.191007
Firmicutes_Clostridia_Peptostreptococcales.Tissierellales_Anaerovoracaceae_Family.XIII.AD3011.group	5.55135e-05	1.61459e-05	-70.9154	0.0642198	0.115304	MASS::glm.nb	0.290846	5.55135e-05	1.34635e-05	-75.7474	0.0216822	0.0475804	MASS::glm.nb	0.242526	1.61459e-05	1.34635e-05	-16.6136	0.708844	0.717932	MASS::glm.nb	0.833864
Firmicutes_Clostridia_Peptostreptococcales.Tissierellales_Peptostreptococcaceae_Romboutsia	0.000146192	0.00292608	1901.53	2.47359e-08	9.77068e-07	log nlme::gls	20.0153	0.000146192	0	-100	0.00220833	0.00725104	log nlme::gls	0	0.00292608	0	-100	4.6666e-11	1.22887e-09	log nlme::gls	0
Firmicutes_Clostridia_unclassified5_unclassified5_unclassified5	0.000152551	2.89304e-05	-81.0355	1.67082e-05	0.000131995	log nlme::gls	0.189645	0.000152551	3.35902e-05	-77.9809	1.87795e-05	0.000123632	log nlme::gls	0.220191	2.89304e-05	3.35902e-05	16.1068	0.518275	0.553293	log nlme::gls	1.16107
Proteobacteria_Alphaproteobacteria_Rhodospirillales_uncultured3_uncultured3	0.00248031	0.000577717	-76.7079	0.000618207	0.00180883	MASS::glm.nb	0.232921	0.00248031	0.00169412	-31.6972	0.356691	0.469643	MASS::glm.nb	0.683028	0.000577717	0.00169412	193.245	0.0114819	0.0210947	MASS::glm.nb	2.93245
Proteobacteria_Gammaproteobacteria_Burkholderiales_Sutterellaceae_Parasutterella	0.00960074	0.00114327	-88.0919	9.1787e-06	9.06396e-05	log nlme::gls	0.119081	0.00960074	0.0353943	268.662	0.00170221	0.00640354	log nlme::gls	3.68662	0.00114327	0.0353943	2995.89	2.5411e-07	2.50933e-06	log nlme::gls	30.9589
Proteobacteria_Gammaproteobacteria_Enterobacterales_Enterobacteriaceae_Escherichia.Shigella	3.29722e-06	0.00013865	4105.06	0.0145002	0.028638	MASS::glm.nb	42.0506	3.29722e-06	1.5783e-05	378.676	0.285545	0.388932	MASS::glm.nb	4.78676	0.00013865	1.5783e-05	-88.6167	0.151503	0.18998	MASS::glm.nb	0.113833
Verrucomicrobiota_Verrucomicrobiae_Verrucomicrobiales_Akkermansiaceae_Akkermansia	0.1738	0.0541234	-68.8588	0.000910536	0.00248042	MASS::glm.nb	0.311412	0.1738	0.289039	66.3052	0.137337	0.216992	MASS::glm.nb	1.66305	0.0541234	0.289039	434.037	1.9079e-06	1.0766e-05	MASS::glm.nb	5.34037

## Sheet: Absolute Abundance
Genera enriched or depleted following the dietary treatment
FAECES
ABSOLUTE ABUNDANCE
Taxonomy	CT	HFD	HFD vs CT					CT	HFD+2'FL	HFD+2'FL vs CT					HFD	HFD+2'FL	HFD+2'FL vs HFD
	Mean	Mean	changes (%)	P-value	p_FDR	model	FoldChange	Mean	Mean	changes (%)	P-value	p_FDR	model	FoldChange	Mean	Mean	changes (%)	P-value	p_FDR	model	FoldChange
Actinobacteriota_Coriobacteriia_Coriobacteriales_Atopobiaceae_Coriobacteriaceae.UCG.002	1.10278e+08	1.03992e+07	-90.57	0.0171981	0.037593	MASS::glm.nb	0.0942999	1.10278e+08	1.18197e+08	7.18099	0.942691	0.942691	MASS::glm.nb	1.07181	1.03992e+07	1.18197e+08	1036.6	0.0141901	0.0255421	MASS::glm.nb	11.366
Actinobacteriota_Coriobacteriia_Coriobacteriales_Eggerthellaceae_Enterorhabdus	8.23275e+06	2.0155e+07	144.815	0	0	MASS::glm.nb	2.44815	8.23275e+06	17055122	107.162	0	0	MASS::glm.nb	2.07162	2.0155e+07	17055122	-15.3801	0	0	MASS::glm.nb	0.846199
Bacteroidota_Bacteroidia_Bacteroidales_Bacteroidaceae_Bacteroides	2.66779e+09	2.17412e+09	-18.5049	0.611528	0.746272	MASS::glm.nb	0.814951	2.66779e+09	5.3785e+10	1916.09	1.8638e-14	6.70968e-14	MASS::glm.nb	20.1609	2.17412e+09	5.3785e+10	2373.87	1.67525e-15	5.74371e-15	MASS::glm.nb	24.7387
Bacteroidota_Bacteroidia_Bacteroidales_Marinifilaceae_Odoribacter	7.48736e+09	1.09664e+09	-85.3534	0.0784237	0.13772	MASS::glm.nb	0.146466	7.48736e+09	2.84977e+09	-61.939	0.363223	0.428722	MASS::glm.nb	0.38061	1.09664e+09	2.84977e+09	159.863	0.38162	0.490654	MASS::glm.nb	2.59863
Bacteroidota_Bacteroidia_Bacteroidales_Muribaculaceae_Muribaculaceae	1.20879e+10	2.83144e+09	-76.5763	8.20153e-06	2.46046e-05	MASS::glm.nb	0.234237	1.20879e+10	3.69166e+09	-69.4599	0.000180717	0.000448677	MASS::glm.nb	0.305401	2.83144e+09	3.69166e+09	30.3812	0.414971	0.524174	MASS::glm.nb	1.30381
Bacteroidota_Bacteroidia_Bacteroidales_Muribaculaceae_Muribaculum	3.4385e+08	4.58712e+07	-86.6595	0.000552678	0.00142117	MASS::glm.nb	0.133405	3.4385e+08	1.81706e+08	-47.1555	0.261197	0.324245	MASS::glm.nb	0.528445	4.58712e+07	1.81706e+08	296.122	0.0182634	0.0317768	MASS::glm.nb	3.96122
Bacteroidota_Bacteroidia_Bacteroidales_Prevotellaceae_Alloprevotella	1.30213e+09	1.21715e+09	-6.52612	0.953078	0.966502	MASS::glm.nb	0.934739	1.30213e+09	7.17776e+08	-44.8767	0.593675	0.637979	MASS::glm.nb	0.551233	1.21715e+09	7.17776e+08	-41.0281	0	0	MASS::glm.nb	0.589719
Bacteroidota_Bacteroidia_Bacteroidales_Prevotellaceae_Prevotellaceae.UCG.001	11792487	3688.11	-99.9687	0.0172301	0.037593	log nlme::gls	0.000312751	11792487	4.8096e+06	-59.2147	4.51382e-05	0.000120369	log nlme::gls	0.407853	3688.11	4.8096e+06	130308	0.281236	0.382056	log nlme::gls	1304.08
Bacteroidota_Bacteroidia_Bacteroidales_Rikenellaceae_Alistipes	1.13877e+10	8.24305e+09	-27.6142	0	0	MASS::glm.nb	0.723858	1.13877e+10	8.60136e+09	-24.4677	0	0	MASS::glm.nb	0.755323	8.24305e+09	8.60136e+09	4.34681	0	0	MASS::glm.nb	1.04347
Bacteroidota_Bacteroidia_Bacteroidales_Rikenellaceae_Rikenellaceae.RC9.gut.group	2.61264e+10	5373868791	-79.4313	1.78587e-05	5.1433e-05	MASS::glm.nb	0.205687	2.61264e+10	4.06103e+09	-84.4562	2.12114e-07	6.64009e-07	MASS::glm.nb	0.155438	5373868791	4.06103e+09	-24.4301	0.447311	0.531803	MASS::glm.nb	0.755699
Bacteroidota_Bacteroidia_Bacteroidales_Tannerellaceae_unclassified.Tannerellaceae	3.40251e+09	5.24782e+07	-98.4577	5.87742e-25	2.11587e-24	MASS::glm.nb	0.0154234	3.40251e+09	1.39496e+09	-59.0021	0.0234784	0.0422611	MASS::glm.nb	0.409979	5.24782e+07	1.39496e+09	2558.17	4.9671e-16	1.78816e-15	MASS::glm.nb	26.5817
Cyanobacteria_Vampirivibrionia_Gastranaerophilales_Gastranaerophilales_Gastranaerophilales	3.79745e+08	1.30405e+07	-96.566	0.11853	0.193959	log nlme::gls	0.0343402	3.79745e+08	1.16775e+09	207.51	0.0111785	0.0211804	log nlme::gls	3.0751	1.30405e+07	1.16775e+09	8854.82	0.450555	0.531803	log nlme::gls	89.5482
Desulfobacterota_Desulfovibrionia_Desulfovibrionales_Desulfovibrionaceae_Bilophila	6.7254e+07	8.67203e+07	28.9444	0.653957	0.747379	MASS::glm.nb	1.28944	6.7254e+07	7.38565e+07	9.81729	0.865275	0.889998	MASS::glm.nb	1.09817	8.67203e+07	7.38565e+07	-14.8336	0.777073	0.810859	MASS::glm.nb	0.851664
Desulfobacterota_Desulfovibrionia_Desulfovibrionales_Desulfovibrionaceae_Desulfovibrionaceaeuncultured.Desulfovibrionaceae.Desulfovibrionaceae	3.65773e+10	38864094230	6.25191	0.9455	0.966502	log nlme::gls	1.06252	3.65773e+10	2.09996e+10	-42.5884	0.0760818	0.112905	log nlme::gls	0.574116	38864094230	2.09996e+10	-45.9665	0.0750145	0.112522	log nlme::gls	0.540335
Firmicutes_Bacilli_Erysipelotrichales_Erysipelatoclostridiaceae_Erysipelatoclostridium	19265123	9.23924e+06	-52.0416	0	0	MASS::glm.nb	0.479584	19265123	1.3953e+07	-27.5737	0	0	MASS::glm.nb	0.724263	9.23924e+06	1.3953e+07	51.0191	0	0	MASS::glm.nb	1.51019
Firmicutes_Bacilli_Erysipelotrichales_Erysipelotrichaceae_Dubosiella	3.36102e+08	1.07939e+08	-67.8851	0.865493	0.944174	log nlme::gls	0.321149	3.36102e+08	5.22223e+07	-84.4623	0.115554	0.156979	log nlme::gls	0.155377	1.07939e+08	5.22223e+07	-51.6185	0.0636631	0.101861	log nlme::gls	0.483815
Firmicutes_Bacilli_Erysipelotrichales_Erysipelotrichaceae_Faecalibaculum	1.07144e+10	1.12134e+09	-89.5343	2.08571e-10	7.151e-10	MASS::glm.nb	0.104657	1.07144e+10	1.28333e+09	-88.0223	8.32041e-10	2.72304e-09	MASS::glm.nb	0.119777	1.12134e+09	1.28333e+09	14.4468	0.703997	0.756534	MASS::glm.nb	1.14447
Firmicutes_Bacilli_Lactobacillales_Lactobacillaceae_Lactobacillus	3.09494e+08	3.64373e+08	17.7318	0.723846	0.801799	MASS::glm.nb	1.17732	3.09494e+08	2.0371e+08	-34.1797	0.352332	0.422799	MASS::glm.nb	0.658203	3.64373e+08	2.0371e+08	-44.093	0.208178	0.288246	MASS::glm.nb	0.55907
Firmicutes_Bacilli_Lactobacillales_Streptococcaceae_Lactococcus	4.48211e+07	8.72115e+07	94.5769	0.0274058	0.0563776	MASS::glm.nb	1.94577	4.48211e+07	2.70953e+07	-39.5478	0.0866265	0.124187	MASS::glm.nb	0.604522	8.72115e+07	2.70953e+07	-68.9315	0.000107303	0.000266406	MASS::glm.nb	0.310685
Firmicutes_Bacilli_RF39_RF39_RF39	1.54642e+08	1.32283e+08	-14.4585	0	0	MASS::glm.nb	0.855415	1.54642e+08	2.0502e+07	-86.7423	0	0	MASS::glm.nb	0.132577	1.32283e+08	2.0502e+07	-84.5014	0	0	MASS::glm.nb	0.154986
Firmicutes_Clostridia_Christensenellales_Christensenellaceae_Christensenellaceae.R.7.group	5.39406e+06	7.28211e+06	35.0024	0	0	glm	1.35002	5.39406e+06	1.75103e+06	-67.5378	0	0	glm	0.324622	7.28211e+06	1.75103e+06	-75.9544	0	0	MASS::glm.nb	0.240456
Firmicutes_Clostridia_Christensenellales_Christensenellaceae_Christensenellaceaeuncultured.Christensenellaceae.Christensenellaceae	3.62925e+07	1.87695e+07	-48.2827	0.00721451	0.0167563	nlme::gls	0.517173	3.62925e+07	307457	-99.1528	5.04151e-10	1.72852e-09	nlme::gls	0.00847165	1.87695e+07	307457	-98.3619	0.000581509	0.00126875	nlme::gls	0.0163807
Firmicutes_Clostridia_Clostridia_Hungateiclostridiaceae_Ruminiclostridium	2.28521e+07	2.34747e+06	-89.7276	4.32936e-08	1.41688e-07	log nlme::gls	0.102724	2.28521e+07	0	-100	7.98565e-06	2.29987e-05	log nlme::gls	0	2.34747e+06	0	-100	0.159747	0.225525	log nlme::gls	0
Firmicutes_Clostridia_Clostridia.UCG.014_Clostridia.UCG.014_Clostridia.UCG.014	1.66958e+08	4.18117e+07	-74.9568	0	0	MASS::glm.nb	0.250432	1.66958e+08	1.27966e+08	-23.3546	0	0	MASS::glm.nb	0.766454	4.18117e+07	1.27966e+08	206.053	0	0	MASS::glm.nb	3.06053
Firmicutes_Clostridia_Clostridia.vadinBB60.group_Clostridia.vadinBB60.group_Clostridia.vadinBB60.group	1.12291e+09	8.40803e+07	-92.5123	0.00166227	0.00398944	MASS::glm.nb	0.0748771	1.12291e+09	9.75528e+07	-91.3125	0.00232167	0.00491647	MASS::glm.nb	0.0868749	8.40803e+07	9.75528e+07	16.0233	0.8569	0.877033	MASS::glm.nb	1.16023
Firmicutes_Clostridia_Lachnospirales_Lachnospiraceae_.Eubacterium..xylanophilum.group	8.08857e+06	6.26136e+06	-22.59	0	0	glm	0.7741	8.08857e+06	1.33596e+06	-83.4833	0	0	glm	0.165167	6.26136e+06	1.33596e+06	-78.6634	0	0	glm	0.213366
Firmicutes_Clostridia_Lachnospirales_Lachnospiraceae_A2	1.69838e+08	8.05827e+07	-52.5533	0.249718	0.359595	MASS::glm.nb	0.474467	1.69838e+08	3.17687e+07	-81.2948	0.007838	0.0152523	MASS::glm.nb	0.187052	8.05827e+07	3.17687e+07	-60.5763	0.150713	0.217027	MASS::glm.nb	0.394237
Firmicutes_Clostridia_Lachnospirales_Lachnospiraceae_Acetatifactor	4.87717e+07	5.44632e+07	11.6697	0.373664	0.517381	log nlme::gls	1.1167	4.87717e+07	5.18521e+06	-89.3684	0.00132237	0.00297533	log nlme::gls	0.106316	5.44632e+07	5.18521e+06	-90.4794	0.0301836	0.0493913	log nlme::gls	0.0952057
Firmicutes_Clostridia_Lachnospirales_Lachnospiraceae_ASF356	2.0742e+07	4.02824e+06	-80.5793	0	0	MASS::glm.nb	0.194207	2.0742e+07	1.14571e+06	-94.4764	0	0	MASS::glm.nb	0.0552364	4.02824e+06	1.14571e+06	-71.558	0	0	glm	0.28442
Firmicutes_Clostridia_Lachnospirales_Lachnospiraceae_Blautia	1.00577e+09	4.2504e+08	-57.74	0.0182632	0.0386749	MASS::glm.nb	0.4226	1.00577e+09	550445152	-45.2715	0.0896906	0.124187	MASS::glm.nb	0.547285	4.2504e+08	550445152	29.5043	0.478654	0.555856	MASS::glm.nb	1.29504
Firmicutes_Clostridia_Lachnospirales_Lachnospiraceae_Dorea	7.82886e+06	1.00509e+07	28.3831	0.0778478	0.13772	log nlme::gls	1.28383	7.82886e+06	1.17798e+06	-84.9534	0.15769	0.210253	log nlme::gls	0.150466	1.00509e+07	1.17798e+06	-88.2799	0.000493297	0.00110992	log nlme::gls	0.117201
Firmicutes_Clostridia_Lachnospirales_Lachnospiraceae_GCA.900066575	1.17798e+08	1.56336e+08	32.7161	0.634701	0.747379	MASS::glm.nb	1.32716	1.17798e+08	1.73019e+08	46.8784	0.507327	0.561962	MASS::glm.nb	1.46878	1.56336e+08	1.73019e+08	10.6712	0.864852	0.877033	MASS::glm.nb	1.10671
Firmicutes_Clostridia_Lachnospirales_Lachnospiraceae_Lachnoclostridium	3.2417e+08	3.3026e+08	1.87867	0.942638	0.966502	nlme::gls	1.01879	3.2417e+08	1.77847e+08	-45.1379	0.075612	0.112905	nlme::gls	0.548621	3.3026e+08	1.77847e+08	-46.1496	0.0689558	0.105634	nlme::gls	0.538504
Firmicutes_Clostridia_Lachnospirales_Lachnospiraceae_Lachnospiraceae.FCS020.group	1.10225e+08	2.9278e+07	-73.4379	0.0716087	0.132201	MASS::glm.nb	0.265621	1.10225e+08	1.92834e+07	-82.5054	0.0149319	0.0275667	MASS::glm.nb	0.174946	2.9278e+07	1.92834e+07	-34.1371	0.570369	0.631793	MASS::glm.nb	0.658629
Firmicutes_Clostridia_Lachnospirales_Lachnospiraceae_Lachnospiraceae.NK4A136.group	1.70093e+09	2.61753e+09	53.8878	0.490529	0.63068	log nlme::gls	1.53888	1.70093e+09	3.86251e+08	-77.2918	0.00218164	0.00475994	log nlme::gls	0.227082	2.61753e+09	3.86251e+08	-85.2437	0.000875425	0.00185384	log nlme::gls	0.147563
Firmicutes_Clostridia_Lachnospirales_Lachnospiraceae_Lachnospiraceae.UCG.004	18596960	4.95196e+07	166.278	0.112762	0.18881	log nlme::gls	2.66278	18596960	7.96615e+06	-57.1642	0.502443	0.561962	log nlme::gls	0.428358	4.95196e+07	7.96615e+06	-83.9131	0.0226974	0.038005	log nlme::gls	0.160869
Firmicutes_Clostridia_Lachnospirales_Lachnospiraceae_Lachnospiraceae.UCG.006	606422	5.43557e+06	796.336	0.145872	0.228321	log nlme::gls	8.96336	606422	5.6993e+08	93882.5	5.88443e-05	0.000151314	log nlme::gls	939.825	5.43557e+06	5.6993e+08	10385.2	2.10554e-05	5.41425e-05	log nlme::gls	104.852
Firmicutes_Clostridia_Lachnospirales_Lachnospiraceae_Lachnospiraceaeuncultured.Lachnospiraceae.Lachnospiraceae	3.59307e+08	8.21602e+08	128.663	0.0656264	0.124345	MASS::glm.nb	2.28663	3.59307e+08	9.5846e+08	166.753	0.0248482	0.0436359	MASS::glm.nb	2.66753	8.21602e+08	9.5846e+08	16.6575	0.731641	0.774679	MASS::glm.nb	1.16657
Firmicutes_Clostridia_Lachnospirales_Lachnospiraceae_Marvinbryantia	3783496	604300	-84.028	0	0	MASS::glm.nb	0.15972	3783496	2.5984e+06	-31.3226	0	0	MASS::glm.nb	0.686774	604300	2.5984e+06	329.986	0	0	glm	4.29986
Firmicutes_Clostridia_Lachnospirales_Lachnospiraceae_Roseburia	2.92301e+08	2.56939e+08	-12.0975	0.881439	0.947218	MASS::glm.nb	0.879025	2.92301e+08	2.68801e+08	-8.03959	0.920662	0.933629	MASS::glm.nb	0.919604	2.56939e+08	2.68801e+08	4.61641	0.958368	0.958368	MASS::glm.nb	1.04616
Firmicutes_Clostridia_Lachnospirales_Lachnospiraceae_Tuzzerella	2.48595e+08	538278993	116.529	0.304147	0.429384	MASS::glm.nb	2.16529	2.48595e+08	1.37134e+08	-44.8365	0.416262	0.475728	MASS::glm.nb	0.551635	538278993	1.37134e+08	-74.5237	0.0689385	0.105634	MASS::glm.nb	0.254763
Firmicutes_Clostridia_Lachnospirales_Lachnospiraceae_unclassified.Lachnospiraceae	9.44793e+08	1.17139e+09	23.9841	0.646012	0.747379	MASS::glm.nb	1.23984	9.44793e+08	8.16602e+08	-13.5681	0.748918	0.78148	MASS::glm.nb	0.864319	1.17139e+09	8.16602e+08	-30.2879	0.440802	0.531803	MASS::glm.nb	0.697121
Firmicutes_Clostridia_Monoglobales_Monoglobaceae_Monoglobus	4.60833e+06	204564	-95.561	NA	NA	NA	0.0443899	4.60833e+06	0	-100	NA	NA	NA	0	204564	0	-100	NA	NA	NA	0
Firmicutes_Clostridia_Oscillospirales_.Eubacterium..coprostanoligenes.group_.Eubacterium..coprostanoligenes.group	5.93138e+07	3.51567e+07	-40.7276	0	0	MASS::glm.nb	0.592724	5.93138e+07	2.77375e+07	-53.236	0	0	MASS::glm.nb	0.46764	3.51567e+07	2.77375e+07	-21.1032	0	0	MASS::glm.nb	0.788968
Firmicutes_Clostridia_Oscillospirales_Butyricicoccaceae_Butyricicoccus	2.36028e+07	1.50566e+07	-36.2085	0.409277	0.555999	log nlme::gls	0.637915	2.36028e+07	438149	-98.1437	0.00118806	0.00275937	log nlme::gls	0.0185634	1.50566e+07	438149	-97.09	0.0113816	0.0215652	log nlme::gls	0.0291001
Firmicutes_Clostridia_Oscillospirales_Butyricicoccaceae_UCG.009	1.11593e+08	8.11548e+07	-27.2764	0	0	MASS::glm.nb	0.727236	1.11593e+08	1.33645e+07	-88.0239	0	0	MASS::glm.nb	0.119761	8.11548e+07	1.33645e+07	-83.532	0	0	MASS::glm.nb	0.16468
Firmicutes_Clostridia_Oscillospirales_Oscillospiraceae_Colidextribacter	1.39863e+09	1.81005e+09	29.4158	0.510192	0.644453	MASS::glm.nb	1.29416	1.39863e+09	6.77337e+08	-51.5715	0.057106	0.0913696	MASS::glm.nb	0.484285	1.81005e+09	6.77337e+08	-62.5791	0.012063	0.0222702	MASS::glm.nb	0.374209
Firmicutes_Clostridia_Oscillospirales_Oscillospiraceae_Intestinimonas	1.33548e+08	2.14769e+08	60.8187	0.623314	0.747379	log nlme::gls	1.60819	1.33548e+08	3.96838e+06	-97.0285	1.32966e-05	3.68214e-05	log nlme::gls	0.0297151	2.14769e+08	3.96838e+06	-98.1523	1.02665e-05	2.73773e-05	log nlme::gls	0.0184774
Firmicutes_Clostridia_Oscillospirales_Oscillospiraceae_NK4A214.group	9.28239e+07	4.04256e+07	-56.4492	0.031402	0.062804	nlme::gls	0.435508	9.28239e+07	4.71793e+07	-49.1733	0.0433739	0.072626	nlme::gls	0.508267	4.04256e+07	4.71793e+07	16.7067	0.679662	0.741449	nlme::gls	1.16707
Firmicutes_Clostridia_Oscillospirales_Oscillospiraceae_Oscillibacter	1.48016e+09	1.93244e+09	30.556	0.537609	0.667376	MASS::glm.nb	1.30556	1.48016e+09	5.77937e+08	-60.9545	0.0254953	0.0437063	MASS::glm.nb	0.390455	1.93244e+09	5.77937e+08	-70.0929	0.00525995	0.0105199	MASS::glm.nb	0.299071
Firmicutes_Clostridia_Oscillospirales_Oscillospiraceae_Oscillospiraceaeuncultured.Oscillospiraceae.Oscillospiraceae	4.09011e+09	5.80632e+09	41.9599	0.436657	0.58221	MASS::glm.nb	1.4196	4.09011e+09	5.60911e+08	-86.2862	5.85423e-06	1.75627e-05	MASS::glm.nb	0.137138	5.80632e+09	5.60911e+08	-90.3396	2.11912e-07	6.35736e-07	MASS::glm.nb	0.0966036
Firmicutes_Clostridia_Oscillospirales_Oscillospiraceae_UCG.005	2.87141e+07	4.89601e+06	-82.9491	0	0	glm	0.170509	2.87141e+07	5.08519e+06	-82.2903	0	0	glm	0.177097	4.89601e+06	5.08519e+06	3.86392	0	0	MASS::glm.nb	1.03864
Firmicutes_Clostridia_Oscillospirales_Oscillospiraceae_unclassified.Oscillospiraceae	1.47262e+09	1.56716e+09	6.41969	0.896472	0.949206	MASS::glm.nb	1.0642	1.47262e+09	9.72966e+08	-33.9296	0.373212	0.433407	MASS::glm.nb	0.660704	1.56716e+09	9.72966e+08	-37.9153	0.318841	0.417392	MASS::glm.nb	0.620847
Firmicutes_Clostridia_Oscillospirales_Ruminococcaceae_Anaerotruncus	286662163	5.00555e+08	74.615	0.176287	0.264431	MASS::glm.nb	1.74615	286662163	6.47813e+07	-77.4015	0.000209722	0.000503332	MASS::glm.nb	0.225985	5.00555e+08	6.47813e+07	-87.0581	7.03433e-07	2.02589e-06	MASS::glm.nb	0.129419
Firmicutes_Clostridia_Oscillospirales_Ruminococcaceae_Candidatus.Soleaferrea	753288	2.63889e+06	250.316	0	0	MASS::glm.nb	3.50316	753288	808508	7.33057	0	0	MASS::glm.nb	1.07331	2.63889e+06	808508	-69.3618	0	0	glm	0.306382
Firmicutes_Clostridia_Oscillospirales_Ruminococcaceae_Caproiciproducens	3.5048e+06	137774	-96.069	0.0492917	0.0959189	log nlme::gls	0.0393101	3.5048e+06	1.73449e+06	-50.5109	0.592884	0.637979	log nlme::gls	0.494891	137774	1.73449e+06	1158.94	0.143432	0.210757	log nlme::gls	12.5894
Firmicutes_Clostridia_Oscillospirales_Ruminococcaceae_Harryflintia	3.36036e+07	4.40029e+07	30.947	0	0	MASS::glm.nb	1.30947	3.36036e+07	3.34081e+07	-0.581707	0	0	MASS::glm.nb	0.994183	4.40029e+07	3.34081e+07	-24.0774	0	0	glm	0.759226
Firmicutes_Clostridia_Oscillospirales_Ruminococcaceae_Paludicola	5.81844e+06	4.59989e+06	-20.9429	NA	NA	NA	0.790571	5.81844e+06	0	-100	NA	NA	NA	0	4.59989e+06	0	-100	NA	NA	NA	0
Firmicutes_Clostridia_Oscillospirales_Ruminococcaceae_Ruminococcaceae.incertae.sedis	1.75626e+08	1.39704e+08	-20.4537	0.720565	0.801799	MASS::glm.nb	0.795463	1.75626e+08	8.36294e+07	-52.3822	0.233416	0.294841	MASS::glm.nb	0.476178	1.39704e+08	8.36294e+07	-40.1383	0.422484	0.524463	MASS::glm.nb	0.598617
Firmicutes_Clostridia_Oscillospirales_Ruminococcaceae_Ruminococcaceaeuncultured.Ruminococcaceae.Ruminococcaceae	7.1325e+08	1.65081e+09	131.448	0.0856188	0.146775	MASS::glm.nb	2.31448	7.1325e+08	2.93476e+08	-58.8537	0.0616388	0.0964781	MASS::glm.nb	0.411463	1.65081e+09	2.93476e+08	-82.2223	0.000403148	0.000936343	MASS::glm.nb	0.177777
Firmicutes_Clostridia_Oscillospirales_Ruminococcaceae_UBA1819	9.15866e+07	26206368	-71.3863	0	0	MASS::glm.nb	0.286137	9.15866e+07	1.41563e+07	-84.5433	0	0	MASS::glm.nb	0.154567	26206368	1.41563e+07	-45.9816	0.0185365	0.0317768	log nlme::gls	0.540184
Firmicutes_Clostridia_Oscillospirales_Ruminococcaceae_unclassified.Ruminococcaceae	6.12335e+07	3.82215e+07	-37.5807	0.447915	0.586361	MASS::glm.nb	0.624193	6.12335e+07	2.63956e+07	-56.8936	0.16388	0.214534	MASS::glm.nb	0.431064	3.82215e+07	2.63956e+07	-30.9405	0.551101	0.629829	MASS::glm.nb	0.690595
Firmicutes_Clostridia_Oscillospirales_UCG.010_UCG.010	1.96377e+07	1.87212e+07	-4.66705	0	0	glm	0.95333	1.96377e+07	1.34375e+07	-31.5729	0	0	glm	0.684271	1.87212e+07	1.34375e+07	-28.223	0	0	glm	0.71777
Firmicutes_Clostridia_Oscillospirales_unclassified.Oscillospirales_unclassified.Oscillospirales	5.68538e+06	1.44903e+06	-74.513	0	0	MASS::glm.nb	0.25487	5.68538e+06	2.4653e+06	-56.6378	0	0	MASS::glm.nb	0.433622	1.44903e+06	2.4653e+06	70.1348	0	0	MASS::glm.nb	1.70135
Firmicutes_Clostridia_Peptococcales_Peptococcaceae_Peptococcaceaeuncultured.Peptococcaceae.Peptococcaceae	1.97819e+08	1.17285e+08	-40.711	0.172723	0.264431	MASS::glm.nb	0.59289	1.97819e+08	328572128	66.0973	0.173909	0.223597	MASS::glm.nb	1.66097	1.17285e+08	328572128	180.149	0.00720992	0.0140301	MASS::glm.nb	2.80149
Firmicutes_Clostridia_Peptococcales_Peptococcaceae_Peptococcus	1.01369e+08	2.04267e+08	101.507	0.121928	0.195085	MASS::glm.nb	2.01507	1.01369e+08	4.6463e+07	-54.1647	0.0768379	0.112905	MASS::glm.nb	0.458353	2.04267e+08	4.6463e+07	-77.2538	0.00107976	0.00222122	MASS::glm.nb	0.227462
Firmicutes_Clostridia_Peptostreptococcales.Tissierellales_Anaerovoracaceae_.Eubacterium..nodatum.group	4.89e+06	1.98059e+07	305.028	0	0	glm	4.05028	4.89e+06	1.5403e+06	-68.501	0	0	glm	0.31499	1.98059e+07	1.5403e+06	-92.223	0	0	MASS::glm.nb	0.0777699
Firmicutes_Clostridia_Peptostreptococcales.Tissierellales_Anaerovoracaceae_Anaerovorax	3.16644e+07	3.25629e+07	2.83748	0.979426	0.979426	MASS::glm.nb	1.02837	3.16644e+07	1.0495e+07	-66.8557	0.295706	0.360861	MASS::glm.nb	0.331443	3.25629e+07	1.0495e+07	-67.7702	0.296678	0.39557	MASS::glm.nb	0.322298
Firmicutes_Clostridia_Peptostreptococcales.Tissierellales_Anaerovoracaceae_Family.XIII.AD3011.group	6.07207e+06	1101438	-81.8606	0.189041	0.277774	log nlme::gls	0.181394	6.07207e+06	581828	-90.418	0.054035	0.0884209	log nlme::gls	0.0958205	1101438	581828	-47.1756	0.564576	0.631793	log nlme::gls	0.528244
Firmicutes_Clostridia_Peptostreptococcales.Tissierellales_Peptostreptococcaceae_Romboutsia	1.91759e+07	2.19807e+08	1046.27	0.000156745	0.000417987	log nlme::gls	11.4627	1.91759e+07	0	-100	0.00250163	0.00514621	log nlme::gls	0	2.19807e+08	0	-100	4.6649e-08	1.52669e-07	log nlme::gls	0
Firmicutes_Clostridia_unclassified.Clostridia_unclassified.Clostridia_unclassified.Clostridia	2.28365e+07	3.17064e+06	-86.1159	0	0	MASS::glm.nb	0.138841	2.28365e+07	6.35068e+06	-72.1907	0	0	MASS::glm.nb	0.278093	3.17064e+06	6.35068e+06	100.296	0	0	MASS::glm.nb	2.00296
Proteobacteria_Alphaproteobacteria_Rhodospirillales_uncultured.Rhodospirillalesuncultured.Rhodospirillales.Rhodospirillales_uncultured.Rhodospirillalesuncultured.Rhodospirillales.Rhodospirillales	371754104	4.39407e+07	-88.1802	2.23454e-05	6.18794e-05	MASS::glm.nb	0.118198	371754104	2.95399e+08	-20.5392	0.63906	0.676651	MASS::glm.nb	0.794608	4.39407e+07	2.95399e+08	572.267	0.0001546	0.00037104	MASS::glm.nb	6.72267
Proteobacteria_Gammaproteobacteria_Burkholderiales_Sutterellaceae_Parasutterella	1.32679e+09	8.24257e+07	-93.7876	3.79283e-06	1.18732e-05	log nlme::gls	0.062124	1.32679e+09	3.98011e+09	199.98	0.0033529	0.0067058	log nlme::gls	2.9998	8.24257e+07	3.98011e+09	4728.73	5.74285e-08	1.79776e-07	log nlme::gls	48.2873
Verrucomicrobiota_Verrucomicrobiae_Verrucomicrobiales_Akkermansiaceae_Akkermansia	1.99183e+10	5.36287e+09	-73.0757	0.00130481	0.00323954	MASS::glm.nb	0.269243	1.99183e+10	3.92194e+10	96.901	0.088096	0.124187	MASS::glm.nb	1.96901	5.36287e+09	3.92194e+10	631.314	1.08832e-06	3.0138e-06	MASS::glm.nb	7.31314
