# Supplementary material for: Human milk oligosaccharide 2’-fucosyllactose protects against high-fat diet-induced obesity by changing intestinal mucus production, composition and degradation linked to changes in gut microbiota and faecal proteome profiles in mice
Source: Gut. 2024 May 13;73(10):1632–49. doi: 10.1136/gutjnl-2023-330301 (PMC11420753; doi:10.1136/gutjnl-2023-330301)
Supplement: Supplementary data [file gutjnl-2023-330301supp006.xlsx]

## Sheet: Sheet1
Wilcoxon rank-sum tests
CT vs HFD						CT vs HFD+2FL						HFD vs HFD+2FL
	V	p.value	-LOG10(p)	FDR			V	p.value	-LOG10(p)	FDR			V	p.value	-LOG10(p)	FDR
Ace	0	2.165e-05	4.6645	0.0015083		Lct	98	4.33e-05	4.3635	0.0040919		Calm1	90	2.165e-05	4.6645	0.00092663
Sod1	0	2.165e-05	4.6645	0.0015083		Pnliprp1	0	6.3864e-05	4.1947	0.0040919		Adh6a	90	2.165e-05	4.6645	0.00092663
Adh6a	1	4.33e-05	4.3635	0.0015083		Beta-galactosidase 2	0	6.3864e-05	4.1947	0.0040919		Anpep	90	2.165e-05	4.6645	0.00092663
Anpep	1	4.33e-05	4.3635	0.0015083		2210407C18Rik	97	7.5776e-05	4.1205	0.0040919		Cdh17	90	2.165e-05	4.6645	0.00092663
Ctsb	1	4.33e-05	4.3635	0.0015083		Smpdl3b	96	0.0001299	3.8864	0.0056117		Cdhr5	90	2.165e-05	4.6645	0.00092663
Naaladl1	1	4.33e-05	4.3635	0.0015083		Slc3a1	98	0.00016688	3.7776	0.0060077		Actg1	1	4.33e-05	4.3635	0.0013238
Actg1	88	8.6601e-05	4.0625	0.0020111		Susd2	1	0.00022064	3.6563	0.0068082		Ighv1-26;Ighv1-42;Ighv1-31	89	4.33e-05	4.3635	0.0013238
Dmbt1	2	8.6601e-05	4.0625	0.0020111		Enpep	93	0.00048713	3.3124	0.012222		Prss2	88	8.6601e-05	4.0625	0.0020592
2210407C18Rik	88	8.6601e-05	4.0625	0.0020111		Alpha-L-fucosidase 1	6.5	0.00051456	3.2886	0.012222		Dnpep	88	8.6601e-05	4.0625	0.0020592
Gp2	3	0.00015155	3.8194	0.0030013		Hspa8;Hspa1a;Hspa1b	6	0.00056582	3.2473	0.012222		Ldha	3	0.00015155	3.8194	0.0029484
Susd2	0	0.00024666	3.6079	0.0030013		Calm1	91	0.00105	2.9788	0.018901		Mep1b	87	0.00015155	3.8194	0.0029484
Prss2	4	0.0002598	3.5854	0.0030013		Gpa33	9	0.00105	2.9788	0.018901		Beta-galactosidase 2	0	0.00019448	3.7111	0.0034682
Cdhr5	4	0.0002598	3.5854	0.0030013		Fcgbp	89	0.0020892	2.68	0.031861		Cela2a	4	0.0002598	3.5854	0.0037179
Cela2a	86	0.0002598	3.5854	0.0030013		Dnpep	89	0.0020892	2.68	0.031861		Lap3	86	0.0002598	3.5854	0.0037179
Lap3	4	0.0002598	3.5854	0.0030013		Beta-D-galactosidase 1	15	0.0022125	2.6551	0.031861		Ace	90	0.00027285	3.5641	0.0037179
Ldha	86	0.0002598	3.5854	0.0030013		Muc3	88	0.0028795	2.5407	0.036586		Ctsb	90	0.00027798	3.556	0.0037179
Mep1b	4	0.0002598	3.5854	0.0030013		Pla2g1b	12	0.0028795	2.5407	0.036586		fusA	1	0.00030908	3.5099	0.003844
Selenbp1;Selenbp2	4	0.0002598	3.5854	0.0030013		Alpi	13	0.0038862	2.4105	0.039972		Actg1.1	2	0.00037281	3.4285	0.003844
Itln1;Itlnb;Itln6;Itln1b	90	0.00027285	3.5641	0.0030013		Muc13	87	0.0038862	2.4105	0.039972		Vil1	5	0.00041135	3.3858	0.003844
Pip	89	0.00036048	3.4431	0.0035451		Amy2;Amy2a1	87	0.0038862	2.4105	0.039972		Pkm	4.5	0.00041314	3.3839	0.003844
Cela3b	5	0.00041135	3.3858	0.0035451		Pnliprp2	87	0.0038862	2.4105	0.039972		Aldh1a1	4.5	0.00041314	3.3839	0.003844
Gmds	85	0.00041135	3.3858	0.0035451		Npc1l1	87	0.0048154	2.3174	0.047045		Tkt	4.5	0.00041314	3.3839	0.003844
Mptx2	85	0.00041135	3.3858	0.0035451		Car6;Ca6	86	0.005196	2.2843	0.047045		Alpha-L-fucosidase 1	4.5	0.00041314	3.3839	0.003844
Vil1	85	0.00041135	3.3858	0.0035451		Iglv1	20	0.005972	2.2239	0.047045		Itln1;Itlnb;Itln6;Itln1b	2	0.00050855	3.2937	0.0045345
fusA	88	0.00042406	3.3726	0.0035451		Mup13	20	0.005972	2.2239	0.047045		Defcr20;Defa20	6	0.00064951	3.1874	0.0051479
Anxa4	84	0.00064951	3.1874	0.0050277		Wfdc2	80	0.005972	2.2239	0.047045		Ckmt1	6	0.00064951	3.1874	0.0051479
Spink3	6	0.00064951	3.1874	0.0050277		Beta-hexosaminidase	17.5	0.0063281	2.1987	0.047045		Dmbt1	84	0.00064951	3.1874	0.0051479
S100a9	86	0.00078289	3.1063	0.0056561		Anxa2	85	0.0068415	2.1649	0.047045		Pla2g1b	3	0.00068774	3.1626	0.0052563
Dlst	6.5	0.00079375	3.1003	0.0056561		Ca1	85	0.0068415	2.1649	0.047045		1810065E05Rik	4	0.0008493	3.0709	0.0061061
Flnb	4	0.0008493	3.0709	0.0056561		Cubn	85	0.0068415	2.1649	0.047045		Actb	6	0.00088964	3.0508	0.0061061
Lct	86	0.00092424	3.0342	0.0056561		Sod2	18.5	0.0081702	2.0878	0.047045		Slc3a1	84	0.00088964	3.0508	0.0061061
Anxa13	86	0.00093877	3.0274	0.0056561		Mup1	15	0.0085942	2.0658	0.047045		Ctrb1	4	0.00092424	3.0342	0.0061061
Pepd	5	0.0009416	3.0261	0.0056561		Cdh17	84	0.0089307	2.0491	0.047045		Pgk1	5	0.0009416	3.0261	0.0061061
Smpdl3b	83	0.00097426	3.0113	0.0056561		Cdhr5	84	0.0089307	2.0491	0.047045		Gp2	83	0.00097426	3.0113	0.0061321
Defcr20;Defa20	83	0.00097426	3.0113	0.0056561		Dpep1	84	0.0089307	2.0491	0.047045		S100a8	6	0.0010902	2.9625	0.0066659
Ester hydrolase C11orf54 homolog	83	0.00097426	3.0113	0.0056561		Ighv1-26;Ighv1-42;Ighv1-31	84	0.0089307	2.0491	0.047045		Aldoa;Aldoart1	5	0.0011978	2.9216	0.0069279
Aco2	83	0.0012081	2.9179	0.006824		Mup3	16	0.0089307	2.0491	0.047045		Pip	5	0.0011978	2.9216	0.0069279
Alpi	8	0.0014506	2.8385	0.0079781		Mep1b	84	0.0089307	2.0491	0.047045		Mptx2	8	0.0014506	2.8385	0.0075712
Try4;Gm5409	6	0.0015919	2.7981	0.008512		Muc2	84	0.0089307	2.0491	0.047045		Selenbp1;Selenbp2	82	0.0014506	2.8385	0.0075712
Reg1	82	0.0016291	2.7881	0.008512		Mptx1	84	0.0089307	2.0491	0.047045		Tff2	82	0.0014506	2.8385	0.0075712
Try5	9	0.0021001	2.6778	0.010207		Ubc;Gm8797;Ubb;Kxd1;Rps27a;Gm1821;Uba52	84	0.0089307	2.0491	0.047045		Igkv9-124	82	0.0014506	2.8385	0.0075712
Gpa33	9	0.0021001	2.6778	0.010207		Igkv5-43	18	0.0091476	2.0387	0.047045		Dlst	82.5	0.0016959	2.7706	0.0086409
Klk1	9	0.0021001	2.6778	0.010207		TOT				42		tuf	9	0.0021001	2.6778	0.010214
Lgals3bp	83	0.0021898	2.6596	0.010402								Sis	81	0.0021001	2.6778	0.010214
Actg1.1	81.5	0.0022577	2.6463	0.010486								Car6;Ca6	80	0.0029877	2.5247	0.013604
Actb	80	0.0023194	2.6346	0.010538								Cela3b	80	0.0029877	2.5247	0.013604
Aldoa;Aldoart1	82	0.0027591	2.5592	0.012269								Alb	10	0.0029877	2.5247	0.013604
Cpb1	10	0.0029877	2.5247	0.012744								Adh1	13.5	0.003451	2.4621	0.014485
Muc2	80	0.0029877	2.5247	0.012744								Hao2	13.5	0.003451	2.4621	0.014485
Tkt	76.5	0.003451	2.4621	0.014371								Beta-D-galactosidase 1	13.5	0.003451	2.4621	0.014485
Pnliprp1	15	0.0035067	2.4551	0.014371								Hist2h4;Hist1h4a	9	0.003452	2.4619	0.014485
Idh1	81	0.0036883	2.4332	0.01445								Try5	79	0.0041352	2.3835	0.016388
Cuzd1	9	0.0037336	2.4279	0.01445								Clps	11	0.0041352	2.3835	0.016388
Clca4b	81	0.0037336	2.4279	0.01445								Naaladl1	79	0.0041352	2.3835	0.016388
Mdh1	80	0.0038677	2.4126	0.014697								Igkv10-95;Igkv10-96	80	0.0047745	2.3211	0.018577
Clca4a	79	0.0041352	2.3835	0.015433								S100a9	11	0.0050312	2.2983	0.019212
Pla2g1b	80	0.0047745	2.3211	0.017405								Mup1	11.5	0.0051173	2.291	0.019212
Tff2	10	0.0048301	2.316	0.017405								Aco2	13	0.0054177	2.2662	0.019989
Akp3;Iap	12	0.0056723	2.2462	0.020094								Fcgbp	78	0.0056723	2.2462	0.020231
Got1	77.5	0.0066332	2.1783	0.023106								Igkv6-23	78	0.0056723	2.2462	0.020231
Ctrb1	78.5	0.006803	2.1673	0.023309								Hspa8;Hspa1a;Hspa1b	11	0.0057876	2.2375	0.020304
Igha;Igh-VJ558;Igh	13	0.0076209	2.118	0.025282								Muc5ac;Muc5AC	15	0.0073351	2.1346	0.025318
Alb	77	0.0076209	2.118	0.025282								2210010C04Rik	13	0.0076209	2.118	0.025887
Hao2	72	0.0087278	2.0591	0.028063								Mdh2	12	0.007854	2.1049	0.026128
Aldh1a1	72	0.0087278	2.0591	0.028063								Cth	78	0.007936	2.1004	0.026128
Mptx1	77	0.0094639	2.0239	0.029969								Iglv1	18	0.0087278	2.0591	0.027069
Blmh	76	0.010132	1.9943	0.030284								Mup13	18	0.0087278	2.0591	0.027069
Gm5571	14	0.010132	1.9943	0.030284								Psap	18	0.0087278	2.0591	0.027069
Pnliprp2	76	0.010132	1.9943	0.030284								Alpha-L-fucosidase 2	18	0.0087278	2.0591	0.027069
Slc5a1	76.5	0.010143	1.9938	0.030284								Reg3b	13	0.0094639	2.0239	0.028911
Dnpep	15	0.013272	1.8771	0.037997								IgG1 anti-TS1 VL	70	0.0098617	2.006	0.028911
Ckmt1	75	0.013272	1.8771	0.037997								Flnb	77	0.010079	1.9966	0.028911
Ighv1-26;Ighv1-42;Ighv1-31	15	0.013272	1.8771	0.037997								Lgals3bp	13	0.010079	1.9966	0.028911
Npc1l1	75	0.013508	1.8694	0.03815								Cdhr2	76	0.010132	1.9943	0.028911
Sod2	18.5	0.014177	1.8484	0.039508								Ubc;Gm8797;Ubb;Kxd1;Rps27a;Gm1821;Uba52	76	0.010132	1.9943	0.028911
Calm1	16	0.017212	1.7642	0.046718								rpoC	14	0.010655	1.9725	0.030001
Igkc;Igk;LC;LOC100046793	16	0.017212	1.7642	0.046718								Cycs	13.5	0.011333	1.9456	0.031498
St14	19.5	0.018354	1.7363	0.049179								Igh.1	74	0.011862	1.9258	0.032544
TOT				78								Egf	16	0.01389	1.8573	0.037626
												Acadm	15	0.015096	1.8211	0.040381
												Mup20	15	0.01555	1.8083	0.040583
												Mup3	15	0.01555	1.8083	0.040583
												Cuzd1	75	0.015965	1.7968	0.041162
												Cubn	74	0.017212	1.7642	0.04283
												Mgam	74	0.017212	1.7642	0.04283
												Prdx6	16	0.017212	1.7642	0.04283
												Mgam2-ps	74	0.01889	1.7238	0.046464
												Gpi	22.5	0.020487	1.6885	0.04926
												Mup21	22.5	0.020487	1.6885	0.04926
												F11r	20	0.02082	1.6815	0.049505
												TOT				90
