# Supplementary material for: Human milk oligosaccharide 2’-fucosyllactose protects against high-fat diet-induced obesity by changing intestinal mucus production, composition and degradation linked to changes in gut microbiota and faecal proteome profiles in mice
Source: Gut. 2024 May 13;73(10):1632–49. doi: 10.1136/gutjnl-2023-330301 (PMC11420753; doi:10.1136/gutjnl-2023-330301)
Supplement: Supplementary data [file gutjnl-2023-330301supp007.xlsx]

## Sheet: Sheet1
										BMI	22	21.3	22.8	22.1	22	18.6	24.5	23.7	20.1	42.5	36.2	60.3	55.8	39.4	33.6	30.5	42	51	50	38.9	40.2	37.8	45.6	48.9	54.2	22	21.3	22.8	22.1	22	18.6	24.5	23.7	20.1	42.5	36.2	60.3	55.8	39.4
											normal	normal	normal	normal	normal	normal	normal	normal	normal	obese	obese	obese	obese	obese	obese	obese	obese	obese	obese	obese	obese	obese	obese	obese	obese	normal	normal	normal	normal	normal	normal	normal	normal	normal	obese	obese	obese	obese	obese
Protein FDR Confidence: Combined	Master	Accession	Description	Exp. q-value: Combined	Sum PEP Score	Coverage [%]	# Peptides	# PSMs	# Unique Peptides	MW [kDa]	# PSMs (by Search Engine): P1 Sequest HT	# PSMs (by Search Engine): P3 Sequest HT	# PSMs (by Search Engine): P4 Sequest HT	# PSMs (by Search Engine): P7 Sequest HT	# PSMs (by Search Engine): P8 Sequest HT	# PSMs (by Search Engine): P11 Sequest HT	# PSMs (by Search Engine): P12 Sequest HT	# PSMs (by Search Engine): P13 Sequest HT	# PSMs (by Search Engine): P17 Sequest HT	# PSMs (by Search Engine): IP18 Sequest HT	# PSMs (by Search Engine): P32 Sequest HT	# PSMs (by Search Engine): P33 Sequest HT	# PSMs (by Search Engine): P34 Sequest HT	# PSMs (by Search Engine): IBP1 Sequest HT	# PSMs (by Search Engine): P5 Sequest HT	# PSMs (by Search Engine): P16 Sequest HT	# PSMs (by Search Engine): P19 Sequest HT	# PSMs (by Search Engine): P21 Sequest HT	# PSMs (by Search Engine): P23 Sequest HT	# PSMs (by Search Engine): P26 Sequest HT	# PSMs (by Search Engine): P27 Sequest HT	# PSMs (by Search Engine): P28 Sequest HT	# PSMs (by Search Engine): P29 Sequest HT	# PSMs (by Search Engine): P30 Sequest HT	# PSMs (by Search Engine): P31 Sequest HT	# Peptides (by Search Engine): P1 Sequest HT	# Peptides (by Search Engine): P3 Sequest HT	# Peptides (by Search Engine): P4 Sequest HT	# Peptides (by Search Engine): P7 Sequest HT	# Peptides (by Search Engine): P8 Sequest HT	# Peptides (by Search Engine): P11 Sequest HT	# Peptides (by Search Engine): P12 Sequest HT	# Peptides (by Search Engine): P13 Sequest HT	# Peptides (by Search Engine): P17 Sequest HT	# Peptides (by Search Engine): IP18 Sequest HT	# Peptides (by Search Engine): P32 Sequest HT	# Peptides (by Search Engine): P33 Sequest HT	# Peptides (by Search Engine): P34 Sequest HT	# Peptides (by Search Engine): IBP1 Sequest HT
High	Master Protein	A0A087WT59	Transthyretin OS=Homo sapiens OX=9606 GN=TTR PE=1 SV=2	0	74.291	89	9	70	9	12.6						1		9				20	1	22						1		16						9	1	9						1		7
High	Master Protein	P01834	Immunoglobulin kappa constant OS=Homo sapiens OX=9606 GN=IGKC PE=1 SV=2	0	63.41	81	7	394	7	11.8	4	1	3	22	4	17	17	32	8	23	6	14	5	18	40	24	8	20	7	22	20	5	15	13	4	7	4	5	3	5	4	3	1	3	2	4	5	7	6
High	Master Protein	P04746	Pancreatic alpha-amylase OS=Homo sapiens OX=9606 GN=AMY2A PE=1 SV=2	0	363.242	78	33	10150	5	57.7	22	18	64	25	31	36	111	1611	67	2310	129	56	23	2202	1298	44	78	79	31	348	35	44	1084	103	40	32	25	21	15	28	13	17	10	17	22	21	21	29	21
High	Master Protein	Q13228	Methanethiol oxidase OS=Homo sapiens OX=9606 GN=SELENBP1 PE=1 SV=2	0	188.271	78	33	935	33	52.4	1		5	46		12	27	41	40	38	37	49	51	48	27	30	50	65	40	58	22	82	30	46	27	22	25	27	25	25	1	1		5		10	18	25	26
High	Master Protein	P19961	Alpha-amylase 2B OS=Homo sapiens OX=9606 GN=AMY2B PE=1 SV=1	0	360.749	77	32	9104	3	57.7	26	18	59	24	27	33	102	1457	63	2021	126	50	21	1996	1135	36	75	70	30	317	32	43	969	90	36	31	25	20	13	27	17	16	10	17	23	20	21	29	21
High	Master Protein	P0DUB6	Alpha-amylase 1A OS=Homo sapiens OX=9606 GN=AMY1A PE=1 SV=1	0	337.541	76	32	9006	5	57.7	25	19	58	22	26	33	98	1439	59	2017	140	50	20	1957	1121	34	71	72	34	319	33	41	949	89	35	32	26	19	12	28	16	16	11	17	24	20	22	29	20
High	Master Protein	P35237	Serpin B6 OS=Homo sapiens OX=9606 GN=SERPINB6 PE=1 SV=3	0	153.795	68	21	269	21	42.6						10	15	18	1		24	39	2	37	21	1	2	5	1	6	21	6		4			14	17	2	15		1				9	8	12	20
High	Master Protein	P04264	Keratin, type II cytoskeletal 1 OS=Homo sapiens OX=9606 GN=KRT1 PE=1 SV=6	0	265.783	67	45	2416	39	66	63	22	123	75	57	74	115	81	65	84	53	82	57	116	95	83	81	57	59	147	114	92	148	111	29	37	29	36	28	41	30	29	14	36	37	34	37	33	35
High	Master Protein	P35527	Keratin, type I cytoskeletal 9 OS=Homo sapiens OX=9606 GN=KRT9 PE=1 SV=3	0	266.678	66	34	1626	34	62	56	9	63	52	36	54	65	62	44	59	39	61	42	92	68	60	42	51	50	77	62	75	117	57	24	23	20	23	21	24	20	17	7	20	29	22	19	23	20
High	Master Protein	P01009	Alpha-1-antitrypsin OS=Homo sapiens OX=9606 GN=SERPINA1 PE=1 SV=3	0	241.288	64	30	3240	3	46.7	29	4	15	56	10	266	92	71	52	73	153	354	76	63	188	57	61	127	72	232	29	113	59	269	96	22	24	26	20	20	14	14	3	10	18	25	22	23	26
High	Master Protein	A0A024R6I7	Alpha-1-antitrypsin OS=Homo sapiens OX=9606 GN=SERPINA1 PE=1 SV=1	0	225.879	64	30	2833	3	46.7	24	2	15	54	10	257	92	65	52	73	131	301	61	51	197	47	63	128	59	185	29	93	47	200	88	22	21	23	17	17	12	12	2	10	18	25	21	23	23
High	Master Protein	P01876	Immunoglobulin heavy constant alpha 1 OS=Homo sapiens OX=9606 GN=IGHA1 PE=1 SV=2	0	99.118	63	14	688	6	37.6	24	7	24	45	31	51	23	55	13	26	18	24	9	49	21	15	9	9	16	22	17	17	13	36	43	10	8	11	5	11	10	8	5	9	8	9	7	12	6
High	Master Protein	P16444	Dipeptidase 1 OS=Homo sapiens OX=9606 GN=DPEP1 PE=1 SV=3	0	132.213	62	17	360	17	45.6	4		7	26	16	19	5	37	22	8	14	38	12	11	3	5	1	18	8	4	5	23	9	4	44	7	8	16	7	7	3	3		6		11	5	14	5
High	Master Protein	A0A0G2JMB2	Immunoglobulin heavy constant alpha 2 (Fragment) OS=Homo sapiens OX=9606 GN=IGHA2 PE=1 SV=1	0	116.559	62	12	956	1	36.5	36	8	26	58	39	69	25	65	22	38	30	31	22	50	27	29	11	22	25	26	24	34	24	41	61	10	10	11	7	10	10	8	5	9	8	9	7	12	8
High	Master Protein	Q8WWU7	Intelectin-2 OS=Homo sapiens OX=9606 GN=ITLN2 PE=2 SV=1	0	76.533	60	14	129	10	36.2			2	2		3	1	2		2	2	21	2	3	7	1	3	20	8	3	2	6	1	3	3	2	2	12	1	3		5		2	1	2	1	2	13
High	Master Protein	P09093	Chymotrypsin-like elastase family member 3A OS=Homo sapiens OX=9606 GN=CELA3A PE=1 SV=3	0	81.213	60	12	623	9	29.5	21	7	12	34	22	22	9	28	24	28	27	29	17	21	51	14	10	24	31	20	9	19	22	10	29	11	11	11	8	10	8	7	7	7	10	11	7	11	11
High	Master Protein	P35908	Keratin, type II cytoskeletal 2 epidermal OS=Homo sapiens OX=9606 GN=KRT2 PE=1 SV=2	0	167.104	59	31	1026	24	65.4	41	13	48	35	20	29	48	40	25	34	20	26	21	46	42	32	35	26	24	64	51	43	57	45	14	23	18	19	17	25	26	18	12	22	27	17	25	27	19
High	Master Protein	P09923	Intestinal-type alkaline phosphatase OS=Homo sapiens OX=9606 GN=ALPI PE=1 SV=2	0	350.756	58	25	3160	25	56.8	42	8	34	24	75	19	79	52	34	155	121	484	218	64	95	163	66	187	117	167	154	289	73	146	14	24	22	24	24	21	18	15	5	13	18	16	20	21	21
High	Master Protein	P08217	Chymotrypsin-like elastase family member 2A OS=Homo sapiens OX=9606 GN=CELA2A PE=1 SV=1	0	56.285	58	9	67	9	28.9			1			1	1			8	2	20	1	2	7	2	1	2		3	1	1	1	8	1	7	2	9	1	2		1		1		1	1		2
High	Master Protein	P0DOY2	Immunoglobulin lambda constant 2 OS=Homo sapiens OX=9606 GN=IGLC2 PE=1 SV=1	0	22.73	56	4	74	2	11.3				3	1	2	7	4		8	2	2		2	7	3	1	1		11	1		1	12		4	2	2		2						2	4	3	4
High	Master Protein	Q99895	Chymotrypsin-C OS=Homo sapiens OX=9606 GN=CTRC PE=1 SV=2	0	82.551	54	11	302	11	29.5	2		4	23	7	10	6	4	15	10	16	27	10	6	25	5	5	15	14	7	6	11	11	7	10	8	8	10	8	6	2	5		3	5	7	5	4	9
High	Master Protein	A0A1B0GVI3	Keratin, type I cytoskeletal 10 OS=Homo sapiens OX=9606 GN=KRT10 PE=1 SV=2	0	170.069	51	27	861	25	63.3	46	6	31	33	14	28	32	44	24	28	24	29	16	37	34	24	24	18	29	44	31	45	47	39	11	19	18	18	12	21	20	13	6	17	23	18	19	23	13
High	Master Protein	P02533	Keratin, type I cytoskeletal 14 OS=Homo sapiens OX=9606 GN=KRT14 PE=1 SV=4	0	65.446	49	21	326	10	51.5	9	2	16	8	5	9	11	17	9	12	7	13	8	15	12	10	12	8	11	15	15	13	29	21	2	10	5	11	6	12	8	6	2	11	9	6	9	14	7
High	Master Protein	O43280	Trehalase OS=Homo sapiens OX=9606 GN=TREH PE=1 SV=2	0	119.396	48	21	269	21	66.5			1		7	1	2	2	1	26	25		2	2	15	7	8	44	8	21	11	6	7	16	22	15	15		2	2		1		1		1	2	2	16
High	Master Protein	O60844	Zymogen granule membrane protein 16 OS=Homo sapiens OX=9606 GN=ZG16 PE=1 SV=3	0	24.584	46	5	65	5	18.1			1	2	1	1		1	1	2	2	9	1	2			1	7	5	1		4	3	4	5	2	1	5	1	2		2		1	1	1		1	5
High	Master Protein	Q9Y6R7	IgGFc-binding protein OS=Homo sapiens OX=9606 GN=FCGBP PE=1 SV=3	0	876.213	44	106	3506	106	571.6	36	5	25	138	34	35	71	241	42	143	226	106	179	468	63	48	79	211	176	145	80	371	95	156	151	65	92	56	64	91	28	15	5	21	3	29	39	88	67
High	Master Protein	Q6UWV6	Ectonucleotide pyrophosphatase/phosphodiesterase family member 7 OS=Homo sapiens OX=9606 GN=ENPP7 PE=1 SV=4	0	207.045	44	18	995	17	51.4	3	1	8	34	4	48	24	33	68	49	42	51	49	45	29	10	26	74	44	58	19	31	40	35	48	15	16	16	14	16	3	15	1	6	1	16	11	14	17
High	Master Protein	P15086	Carboxypeptidase B OS=Homo sapiens OX=9606 GN=CPB1 PE=1 SV=4	0	58.393	43	15	167	14	47.3			2	1			8	2	3	7	21	6	2	5	20		8	11	9	16	4	6	4	16		6	15	5	2	5		1		2			8	2	10
High	Master Protein	A0A286YEY5	Immunoglobulin heavy constant alpha 2 (Fragment) OS=Homo sapiens OX=9606 GN=IGHA2 PE=1 SV=1	0	50.44	43	10	577	2	42.3	19	5	8	37	25	43	10	43	12	27	19	20	15	31	17	18	4	16	16	12	10	24	15	25	40	6	6	7	4	6	6	4	3	5	4	7	3	8	4
High	Master Protein	Q92485	Acid sphingomyelinase-like phosphodiesterase 3b OS=Homo sapiens OX=9606 GN=SMPDL3B PE=1 SV=2	0	58.67	42	11	234	11	50.8			4	12	4	7	5	6	10	12	10	15	11	5	9	9	13	14	5	10	1	20	9	9	16	8	7	8	6	4		3		4	1	6	5	5	8
High	Master Protein	P08779	Keratin, type I cytoskeletal 16 OS=Homo sapiens OX=9606 GN=KRT16 PE=1 SV=4	0	54.295	41	16	225	8	51.2	3	1	8	7	4	9	10	9	4	8	5	12	4	9	8	7	7	5	7	10	14	11	25	14	1	6	3	10	3	6	2	4	1	6	4	7	8	6	3
High	Master Protein	P04040	Catalase OS=Homo sapiens OX=9606 GN=CAT PE=1 SV=3	0	44.537	41	16	25	16	59.7				1		20		1						3																3						16		1
High	Master Protein	P15085	Carboxypeptidase A1 OS=Homo sapiens OX=9606 GN=CPA1 PE=1 SV=2	0	77.99	41	12	276	11	47.1			2	1		2	7	3	5	3	15	18	5	4	43	3	12	37	13	24	5	5	15	20		3	9	12	5	4		9		2	5	2	6	3	10
High	Master Protein	P13647	Keratin, type II cytoskeletal 5 OS=Homo sapiens OX=9606 GN=KRT5 PE=1 SV=3	0	87.088	40	25	441	15	62.3	13	1	22	17	7	15	26	21	5	17	9	14	4	24	26	12	14	5	6	31	26	16	36	21	3	11	8	11	3	12	9	5	1	13	12	8	16	13	5
High	Master Protein	P04054	Phospholipase A2 OS=Homo sapiens OX=9606 GN=PLA2G1B PE=1 SV=3	0	24.841	40	4	39	4	16.3				6	3			2	1	1	2	4		3	7			1		1		1		1		1	2	3		2		1			1			2	4
High	Master Protein	O43895	Xaa-Pro aminopeptidase 2 OS=Homo sapiens OX=9606 GN=XPNPEP2 PE=1 SV=3	0	130.369	39	21	403	21	75.6	7	3	12	16	21		16	36		17	39	3	13	33	20		1	8	14	23	5	29	7	27	23	12	19	3	10	16	4	6	3	8	6		9	20	3
High	Master Protein	P04406	Glyceraldehyde-3-phosphate dehydrogenase OS=Homo sapiens OX=9606 GN=GAPDH PE=1 SV=3	0	39.842	39	8	54	8	36		1	2	13							9	9						4		3			1	2			7	7					1	2	1				6
High	Master Protein	P28838	Cytosol aminopeptidase OS=Homo sapiens OX=9606 GN=LAP3 PE=1 SV=3	0	37.041	37	13	41	13	56.1			1	1		4					5	1		11	4			3		1		7					5	1		9				1	1	4			2
High	Master Protein	A0A7I2V2R5	Dipeptidyl peptidase 4 OS=Homo sapiens OX=9606 GN=DPP4 PE=1 SV=1	0	142.071	36	23	599	23	84.5				36		33	20	40	28	26	30	27	27	34	29	34	20	31	16	46	12	16	24	29	24	16	16	18	15	18						18	15	19	16
High	Master Protein	P08473	Neprilysin OS=Homo sapiens OX=9606 GN=MME PE=1 SV=2	0	94.4	36	21	134	21	85.5				12	1	2	1	16	2	1	27	2		3	7	3		1		11	4	3	4	14	2	1	18	2		3					1	2	1	12	12
High	Master Protein	A0A7I2V3U2	Nucleophosmin OS=Homo sapiens OX=9606 GN=NPM1 PE=1 SV=1	0	46.019	36	5	65	5	21.6				12		1				5	5	7	2	1				7	5	3		6		2	1	3	2	3	2	1						1			4
High	Master Protein	P02538	Keratin, type II cytoskeletal 6A OS=Homo sapiens OX=9606 GN=KRT6A PE=1 SV=3	0	66.434	35	21	350	3	60	8	2	14	13	7	14	17	13	5	14	6	10	5	18	16	7	11	5	6	23	18	18	37	14	4	8	5	7	4	6	4	4	2	6	7	7	9	6	5
High	Master Protein	P01833	Polymeric immunoglobulin receptor OS=Homo sapiens OX=9606 GN=PIGR PE=1 SV=4	0	113.886	35	20	234	20	83.2	4	1	5	20	10	17		35	4	1	21	2		32				1	1	4	11	18		18	8	1	14	2		16	3	2	1	5	10	13		19	2
High	Master Protein	C9JFW8	Aminopeptidase NAALADL1 OS=Homo sapiens OX=9606 GN=NAALADL1 PE=1 SV=1	0	102.839	35	20	462	20	76.9				26		25	17	15	17	19	20	30	18	20	13	21	23	38	17	24	21	19	16	14	24	12	15	14	10	13						17	9	11	11
High	Master Protein	A0A8V8TLR1	Xaa-Pro dipeptidase OS=Homo sapiens OX=9606 GN=PEPD PE=4 SV=1	0	53.131	35	12	90	12	55.9		1	1	7	2	8	8	4	1	1	4			11	2	2	1		3	5	5	2	1	10	8	1	3			10			1	1		7	6	4	2
High	Master Protein	Q8WWA0	Intelectin-1 OS=Homo sapiens OX=9606 GN=ITLN1 PE=1 SV=1	0	41.592	35	10	129	6	34.9	1		1	6	1	5		2		5	2	17	3	2	16	1	2	15	3	3	3	6	3	3	3	4	2	8	2	2	1	5		1	1	4		2	10
High	Master Protein	P01011	Alpha-1-antichymotrypsin OS=Homo sapiens OX=9606 GN=SERPINA3 PE=1 SV=2	0	73.223	34	12	124	12	47.6						2			1	4		2	4		25		6	14	17	15		4	3	20		4		2	3			2			1	2			3
High	Master Protein	P04259	Keratin, type II cytoskeletal 6B OS=Homo sapiens OX=9606 GN=KRT6B PE=1 SV=5	0	64.872	33	20	370	2	60	11	4	16	14	8	13	17	14	6	14	6	10	6	19	17	8	12	5	7	24	19	18	36	15	4	8	5	7	5	7	5	5	3	7	8	6	8	7	5
High	Master Protein	O43451	Maltase-glucoamylase OS=Homo sapiens OX=9606 GN=MGAM PE=1 SV=6	0	364.9	32	52	1454	49	311.8	1			98		106	30	72	86	36	40	104	58	50	91	65	63	119	59	89	39	49	37	28	66	24	25	46	35	30	1	6			4	43	21	38	33
High	Master Protein	A0A0A0MSN4	Angiotensin-converting enzyme OS=Homo sapiens OX=9606 GN=ACE PE=1 SV=1	0	196.068	32	29	364	29	142.3							9	34		20	51	18	12	62	3	9	8	17	9	24	1	11	11	21	21	11	25	12	9	22							6	16	14
High	Master Protein	P08861	Chymotrypsin-like elastase family member 3B OS=Homo sapiens OX=9606 GN=CELA3B PE=1 SV=3	0	41.826	32	8	156	5	29.2	5	1	2	9	5	5	1	8	4	8	7	14	3	3	15	1	1	4	9	9	1	6	3	5	10	5	3	7	2	3	2	1	1	1	2	3	1	3	3
High	Master Protein	Q86YZ3	Hornerin OS=Homo sapiens OX=9606 GN=HRNR PE=1 SV=2	0	196.673	31	28	644	28	282.2	27	8	28	29	12	24	43	22	14	18	15	21	11	42	30	28	23	13	10	30	29	22	32	18	8	13	13	16	7	24	20	15	8	19	21	15	22	15	14
High	Master Protein	A8K7I4	Calcium-activated chloride channel regulator 1 OS=Homo sapiens OX=9606 GN=CLCA1 PE=1 SV=3	0	125.771	31	23	183	23	100.2		1	5	11	2	2		36	2		41			24	9				3	8	13	1		6			23			12			1	4	10	2		19	4
High	Master Protein	Q16820	Meprin A subunit beta OS=Homo sapiens OX=9606 GN=MEP1B PE=1 SV=3	0	82.471	31	15	106	15	79.5				1		11	2	6			29			13						10	6	12		9			15			11						8	2	6
High	Master Protein	Q86UP6	CUB and zona pellucida-like domain-containing protein 1 OS=Homo sapiens OX=9606 GN=CUZD1 PE=2 SV=1	0	64.261	31	11	164	11	68.1	4		1	8	2	5	2	6	5	4	17	12	6	12	4	3	2	7	5	9	3	9	5	6	11	3	9	5	3	8	3	1		1	4	3	1	5	4
High	Master Protein	P30740	Leukocyte elastase inhibitor OS=Homo sapiens OX=9606 GN=SERPINB1 PE=1 SV=1	0	51.413	31	9	45	9	42.7						17		1		1	7			9					1	1		1		5		1	6			6						9		1	2
High	Master Protein	A0A4W8ZXM2	Immunoglobulin heavy variable 3-72 OS=Homo sapiens OX=9606 GN=IGHV3-72 PE=4 SV=1	0	12.862	30	2	40	2	11.2	2		2	2	2	2	2	2		2	2			2	1	1			1	3	2	1	1	5	3	1	1			1	1			1		1	1	1
High	Master Protein	Q9NR71	Neutral ceramidase OS=Homo sapiens OX=9606 GN=ASAH2 PE=1 SV=2	0	96.946	29	16	383	16	85.5	3	1	6	14	11	13	8	7	10	14	21	21	7	29	9	3	4	24	16	18	8	20	9	26	14	9	13	13	5	14	3	9	1	4	9	10	6	5	13
High	Master Protein	Q03154	Aminoacylase-1 OS=Homo sapiens OX=9606 GN=ACY1 PE=1 SV=1	0	21.051	28	8	26	8	45.9				3							5	1		7				2				7		1			4	1		6
High	Master Protein	P14410	Sucrase-isomaltase, intestinal OS=Homo sapiens OX=9606 GN=SI PE=1 SV=6	0	167.663	27	39	386	38	209.3				11		3	19	8	9	14	50	10	6	15	24	2	34	22	17	27	12	13	3	54	9	13	31	9	5	13					13	1	15	6	9
High	Master Protein	Q16819	Meprin A subunit alpha OS=Homo sapiens OX=9606 GN=MEP1A PE=1 SV=2	0	125.751	27	15	312	15	84.4	6		18	9		59	17	9	1		47	17		19		1				30	4	18	2	3			15	9		12	4	5		8	10	15	9	6
High	Master Protein	O95497	Pantetheinase OS=Homo sapiens OX=9606 GN=VNN1 PE=1 SV=2	0	50.437	27	9	109	9	57				1	7			12	3		8		10	4			13	12	9	6	1	5		7	6		6		9	4								8	4
High	Master Protein	Q6GPI1	Chymotrypsinogen B2 OS=Homo sapiens OX=9606 GN=CTRB2 PE=2 SV=2	0	10.399	27	4	10	4	27.9				4							1	2			1							1					1	2											1
High	Master Protein	E7EQB2	Lactotransferrin (Fragment) OS=Homo sapiens OX=9606 GN=LTF PE=1 SV=1	0	35.623	26	12	18	12	76.6						7					8			2													7			2					1	7
High	Master Protein	P01780	Immunoglobulin heavy variable 3-7 OS=Homo sapiens OX=9606 GN=IGHV3-7 PE=1 SV=2	0	14.115	26	3	52	2	12.9	2	1	4	1	2	2	2	3	1	3	1			3	5	2	1			4				7	3	3	1			3	2	1	1	3	1	2	2	2	2
High	Master Protein	A0A0J9YY99	Ig-like domain-containing protein (Fragment) OS=Homo sapiens OX=9606 PE=1 SV=1	0	12.328	26	3	40	2	13	2	1	3		2	2	1	3		2				2	3	2				2				10	1	2				2	1		1	1		2	1	2	2
High	Master Protein	P02768	Albumin OS=Homo sapiens OX=9606 GN=ALB PE=1 SV=2	0	34.925	24	9	26	9	69.3						6		9			5			5													5			5					1	5		7
High	Master Protein	J3QTR3	Ubiquitin-40S ribosomal protein S27a (Fragment) OS=Homo sapiens OX=9606 GN=RPS27A PE=1 SV=1	0	7.149	24	2	24	2	12.2	1	1	1	1	1	1	1	1			2	2	1	1					1	1	1	1	1		2		2	2	1	1	1	1	1	1	1	1	1	1	1
High	Master Protein	P05164	Myeloperoxidase OS=Homo sapiens OX=9606 GN=MPO PE=1 SV=1	0	51.381	23	13	66	12	83.8				1		19					17			8										3			11			7					11	12
High	Master Protein	Q12864	Cadherin-17 OS=Homo sapiens OX=9606 GN=CDH17 PE=1 SV=3	0	63.334	23	12	62	12	92.2								2	1	2	6	1		17		2		1		3	1	11		4		2	5	1		11								2	8
High	Master Protein	Q14002	Carcinoembryonic antigen-related cell adhesion molecule 7 OS=Homo sapiens OX=9606 GN=CEACAM7 PE=1 SV=2	0	24.98	23	4	57	4	29.3			2	2	1	2	2	2	2	3		2	2	3	3					4		3	3	6	3	3		2	2	3		1		2	2	2	2	2	4
High	Master Protein	Q04609	Glutamate carboxypeptidase 2 OS=Homo sapiens OX=9606 GN=FOLH1 PE=1 SV=1	0	31.351	22	11	38	11	84.3				13			1			1	8			3				3	1	1	4	1		2		1	7			3							1
High	Master Protein	P40199	Carcinoembryonic antigen-related cell adhesion molecule 6 OS=Homo sapiens OX=9606 GN=CEACAM6 PE=1 SV=4	0	26.847	22	4	79	3	37.2	2		2	2	3	5	2	2	1	5	2	2		6	7	1	2	5	2	6		1	2	5		3	2	2		4	2	2		2	2	4	2	2	4
High	Master Protein	A0A0C4DH38	Immunoglobulin heavy variable 5-51 OS=Homo sapiens OX=9606 GN=IGHV5-51 PE=3 SV=1	0	8.691	22	2	11	2	12.7						2		1		1				1	1					2				2		1				1						1		1	1
High	Master Protein	A6XMV9	Protease serine 2 preproprotein OS=Homo sapiens OX=9606 GN=PRSS2 PE=1 SV=1	0	25.456	21	4	56	3	28			1			1	3	2	1	3	1	4	2	2	6	2	3	3		4	2	2	2	2		3	1	3	2	2		1		1		1	3	2	4
High	Master Protein	Q04695	Keratin, type I cytoskeletal 17 OS=Homo sapiens OX=9606 GN=KRT17 PE=1 SV=2	0	24.66	20	9	114	2	48.1	2		5	2	3	3	4	5	3	4	2	6	3	5	5	4	4	2	3	6	6	5	11	11	1	4	2	6	2	5	2	3		4	2	2	4	5	2
High	Master Protein	P06331	Immunoglobulin heavy variable 4-34 OS=Homo sapiens OX=9606 GN=IGHV4-34 PE=1 SV=2	0	7.753	20	2	19	2	13.8			1		1	1	1	2		3				2	2	1				2				2		2				1				1		1	1	2	1
High	Master Protein	P48147	Prolyl endopeptidase OS=Homo sapiens OX=9606 GN=PREP PE=1 SV=2	0	27.605	19	8	12	8	80.6											2			7								3					2			7
High	Master Protein	P15289	Arylsulfatase A OS=Homo sapiens OX=9606 GN=ARSA PE=1 SV=3	0	26.18	19	6	38	6	53.6				2		5	3	2			4			5		1		2			4	7	2				3			3						2	3	2	1
High	Master Protein	Q92484	Acid sphingomyelinase-like phosphodiesterase 3a OS=Homo sapiens OX=9606 GN=SMPDL3A PE=1 SV=2	0	22.289	19	6	58	6	51.2				1			6	2	2	2		2	3	5	1		3	2	5	5	5	4		6	2	2		2	3	5							4	2	2
High	Master Protein	A0A0B4J231	Immunoglobulin lambda-like polypeptide 5 OS=Homo sapiens OX=9606 GN=IGLL5 PE=1 SV=1	0	16.865	19	3	41	1	23.1				3		2	3	4		5	1	2		1	4	4				5				3		3	1	2		1						2	3	3	3
High	Master Protein	A0A075B7B8	Immunoglobulin heavy variable 3/OR16-12 (non-functional) (Fragment) OS=Homo sapiens OX=9606 GN=IGHV3OR16-12 PE=1 SV=1	0	11.274	19	2	39	1	12.9	2	1	4		2	1	1	2		1				2	3	2		1		3			1	8	2	1				2	1		1	2		1	1	1	1
High	Master Protein	P0DP04	Immunoglobulin heavy variable 3-43D OS=Homo sapiens OX=9606 GN=IGHV3-43D PE=3 SV=1	0	10.202	19	2	32	1	13	2	1	2		1	1	1	3		1				1	3	2				4				7	2	1				1	2		1	1		1	1	2
High	Master Protein	A0A0J9YX35	Immunoglobulin heavy variable 3-64D OS=Homo sapiens OX=9606 GN=IGHV3-64D PE=3 SV=1	0	5.558	19	2	4	2	12.8												1												3				1
High	Master Protein	P59665	Neutrophil defensin 1 OS=Homo sapiens OX=9606 GN=DEFA1B PE=1 SV=1	0	4.526	19	2	4	2	10.2												1			1													1											2
High	Master Protein	A0A024R0K5	Carcinoembryonic antigen-related cell adhesion molecule 5 OS=Homo sapiens OX=9606 GN=CEACAM5 PE=1 SV=1	0	69.373	18	9	419	7	76.7	8		12	9	7	14	7	26	5	18	29	18	7	51	19	12	10	25	21	21	10	6	13	14	8	7	8	6	4	9	6	5		5	5	7	5	8	6
High	Master Protein	A0A7I2V3X6	Angiotensin-converting enzyme OS=Homo sapiens OX=9606 GN=ACE2 PE=1 SV=1	0	38.001	18	9	40	9	90.3								5			10		2	2				4		1	3	12					7		2	2								4	1
High	Master Protein	Q13867	Bleomycin hydrolase OS=Homo sapiens OX=9606 GN=BLMH PE=1 SV=1	0	23.831	18	6	24	6	52.5				1		1			1	2	2	4					1	4						2		1	1	4							1	1			4
High	Master Protein	Q9BYE9	Cadherin-related family member 2 OS=Homo sapiens OX=9606 GN=CDHR2 PE=1 SV=2	0	102.989	17	18	531	18	141.5	8	4	7	8	14	27	14	17	26	23	15	39	18	17	16	24	25	41	13	19	10	16	25	24	23	13	11	16	10	12	6	5	4	7	8	11	10	11	14
High	Master Protein	P01857	Immunoglobulin heavy constant gamma 1 OS=Homo sapiens OX=9606 GN=IGHG1 PE=1 SV=1	0	10.21	17	4	11	3	36.1						2	1			1					2					2				2		1										2	1		1
High	Master Protein	E7EQ64	Serine protease 1 OS=Homo sapiens OX=9606 GN=PRSS1 PE=1 SV=1	0	18.024	17	3	26	2	28.1			1				1	1	1	1	1	2	1	2	3	1	1	1		1	1		1			1	1	1	1	2		1		1			1	1	3
High	Master Protein	P06312	Immunoglobulin kappa variable 4-1 OS=Homo sapiens OX=9606 GN=IGKV4-1 PE=1 SV=1	0	5.312	17	2	9	2	13.4								1							2	1		1		1				2														1	1
High	Master Protein	P13688	Carcinoembryonic antigen-related cell adhesion molecule 1 OS=Homo sapiens OX=9606 GN=CEACAM1 PE=1 SV=2	0	43.829	16	5	187	4	57.5	6		6	3	3	9	8	10	2	9	10	8	2	17	6	5	8	7	4	10	7	4	6	15	2	3	4	3	2	4	3	2		3	3	2	3	5	3
High	Master Protein	P05451	Lithostathine-1-alpha OS=Homo sapiens OX=9606 GN=REG1A PE=1 SV=3	0	7.532	16	2	3	2	18.7															3
High	Master Protein	P15144	Aminopeptidase N OS=Homo sapiens OX=9606 GN=ANPEP PE=1 SV=4	0	58.001	15	13	62	13	109.5							5		1	1			4		1			7		21	3	1		6		1			4								4		8
High	Master Protein	Q9UGM3	Deleted in malignant brain tumors 1 protein OS=Homo sapiens OX=9606 GN=DMBT1 PE=1 SV=2	0	29.766	15	8	57	8	260.6		3	4		3		1	2	1	1	6	2		5	3		3	1		7	1	2		5	1	1	6	2		4		1	3	4			1	2	4
High	Master Protein	Q08380	Galectin-3-binding protein OS=Homo sapiens OX=9606 GN=LGALS3BP PE=1 SV=1	0	30.096	15	7	37	7	65.3			1	5		2		8			3			5								3		2			3			5				1	5	2		6	1
High	Master Protein	Q6UWP8	Suprabasin OS=Homo sapiens OX=9606 GN=SBSN PE=1 SV=2	0	11.066	15	2	36	2	60.5	1	1	2	2		1	2		1	1		1	2	1	2	2	1	2		2	1	1	3	1		1		1	2	1	1	2	1	2	2	1	2		1
High	Master Protein	P55259	Pancreatic secretory granule membrane major glycoprotein GP2 OS=Homo sapiens OX=9606 GN=GP2 PE=1 SV=3	0	30.108	14	5	43	5	59.4				5	1			5			5			5								4		6			3			3					5			3
High	Master Protein	P16233	Pancreatic triacylglycerol lipase OS=Homo sapiens OX=9606 GN=PNLIP PE=1 SV=1	0	11.521	14	4	8	4	51.1				5							1														1		1								1
High	Master Protein	P11678	Eosinophil peroxidase OS=Homo sapiens OX=9606 GN=EPX PE=1 SV=2	0	20.549	13	7	37	6	81			1	7		2		3	1	1	4	4		3				1	1	1		3				1	3	2		1				1	1	2		2	1
High	Master Protein	A0A3B3ISV3	Collagen alpha-1(IV) chain (Fragment) OS=Homo sapiens OX=9606 GN=COL4A1 PE=1 SV=1	0	18.844	13	3	28	3	39.8											8	3		3	3			3		1					4		3	2		2					1				1
High	Master Protein	D6REY1	Chitotriosidase-1 OS=Homo sapiens OX=9606 GN=CHIT1 PE=1 SV=1	0	10.597	13	3	7	3	40.2						5					2																2									3
High	Master Protein	P31997	Carcinoembryonic antigen-related cell adhesion molecule 8 OS=Homo sapiens OX=9606 GN=CEACAM8 PE=1 SV=2	0	8.221	13	3	70	2	38.1	2		4	2	2	5	2	3	2	3	3	2	1	6	3	1	2	2	1	3	2	2	3	5	1	1	1	1	1	1	1	1		1	1	3	1	1	1
High	Master Protein	P00390	Glutathione reductase, mitochondrial OS=Homo sapiens OX=9606 GN=GSR PE=1 SV=2	0	8.242	12	4	6	4	56.2														4								2								4
High	Master Protein	P08236	Beta-glucuronidase OS=Homo sapiens OX=9606 GN=GUSB PE=1 SV=2	0	12.636	11	4	16	4	74.7				1								3	1	1				1		1		1		1	2			2	1	1									3
High	Master Protein	Q8IVL8	Carboxypeptidase O OS=Homo sapiens OX=9606 GN=CPO PE=1 SV=1	0	12.707	11	3	10	3	42.5								3							2					3				2														2
High	Master Protein	Q5JXI8	Four and a half LIM domains protein 1 (Fragment) OS=Homo sapiens OX=9606 GN=FHL1 PE=1 SV=1	0	9.263	11	2	3	2	29.1												2						1										2
High	Master Protein	P98073	Enteropeptidase OS=Homo sapiens OX=9606 GN=TMPRSS15 PE=1 SV=3	0	37.726	10	7	93	7	112.9					1		6	7	6	5	2			11	10		5	5		11	3		6	11	1	3	2			6							3	5	3
High	Master Protein	P12830	Cadherin-1 OS=Homo sapiens OX=9606 GN=CDH1 PE=1 SV=3	0	47.193	10	6	169	6	97.4						9	7	6	8	7	3	9	9	8	7	8	12	12	1	11	10	9	5	8	8	5	2	6	5	4						5	4	5	5
High	Master Protein	P05186	Alkaline phosphatase, tissue-nonspecific isozyme OS=Homo sapiens OX=9606 GN=ALPL PE=1 SV=4	0	16.524	10	4	40	4	57.3			1	2				1		3	1	3	1	3	2	1	3	1	2	4		1	3	3	3	3	1	3	1	2		1		1				1	1
High	Master Protein	Q6UX06	Olfactomedin-4 OS=Homo sapiens OX=9606 GN=OLFM4 PE=1 SV=1	0	10.607	10	4	4	4	57.2			4																															4
High	Master Protein	P06870	Kallikrein-1 OS=Homo sapiens OX=9606 GN=KLK1 PE=1 SV=2	0	5.337	10	2	5	2	28.9											1				3									1			1
High	Master Protein	P14923	Junction plakoglobin OS=Homo sapiens OX=9606 GN=JUP PE=1 SV=3	0	14.832	9	5	12	5	81.7			1				3								1					2				5										1			3
High	Master Protein	P01871	Immunoglobulin heavy constant mu OS=Homo sapiens OX=9606 GN=IGHM PE=1 SV=4	0	16.049	9	4	13	4	49.4			1					1		1	1				4					3				1		1	1							1				1
High	Master Protein	A0A286YFJ8	Immunoglobulin heavy constant gamma 4 (Fragment) OS=Homo sapiens OX=9606 GN=IGHG4 PE=1 SV=1	0	8.609	9	3	11	2	43.8						3	2					1			1					2				2				1								3	2
High	Master Protein	P09848	Lactase/phlorizin hydrolase OS=Homo sapiens OX=9606 GN=LCT PE=1 SV=3	0	42.06	8	11	20	11	218.5											4										1			15			4
High	Master Protein	P10253	Lysosomal alpha-glucosidase OS=Homo sapiens OX=9606 GN=GAA PE=1 SV=4	0	13.953	8	5	14	5	105.3											2	1	1	2			1					4		2			2	1	1	2
High	Master Protein	Q9HBB8	Cadherin-related family member 5 OS=Homo sapiens OX=9606 GN=CDHR5 PE=1 SV=3	0	26.927	8	4	59	4	88.2					1	2	2	3	1	4	5			4	3	2	2	6		2	5	1	3	2		3	3			2		1			4	2	1	2	1
High	Master Protein	Q01459	Di-N-acetylchitobiase OS=Homo sapiens OX=9606 GN=CTBS PE=1 SV=1	0	6.836	8	2	2	2	43.7								2																														2
High	Master Protein	P17174	Aspartate aminotransferase, cytoplasmic OS=Homo sapiens OX=9606 GN=GOT1 PE=1 SV=3	0	4.268	8	2	3	2	46.2														1								2								1
High	Master Protein	Q02817	Mucin-2 OS=Homo sapiens OX=9606 GN=MUC2 PE=1 SV=2	0	154.697	7	24	292	24	540	1	3	11	20	4	11	9	22	3	22	13	7	4	29	7	4	1	5	7	14	6	26	7	21	13	6	7	3	2	17	1	5	3	6	2	7	6	14	5
High	Master Protein	Q9Y6X5	Bis(5'-adenosyl)-triphosphatase ENPP4 OS=Homo sapiens OX=9606 GN=ENPP4 PE=1 SV=3	0	11.803	7	4	121	3	51.6	1		2	2	1	4	3	2	7	6	2	4	6	5	2	2	4	11	4	9	3	3	5	8	3	2	1	1	2	3	1	1		1	1	1	1	1	1
High	Master Protein	P51688	N-sulphoglucosamine sulphohydrolase OS=Homo sapiens OX=9606 GN=SGSH PE=1 SV=1	0	12.959	7	3	9	3	56.7																		1		1				4															2
High	Master Protein	Q14315	Filamin-C OS=Homo sapiens OX=9606 GN=FLNC PE=1 SV=3	0	51.199	6	11	95	11	290.8						1	4	7			22	6		4	7		5	10		8	6	2		4	5		10	5		4						1	4	5	4
High	Master Protein	Q5D862	Filaggrin-2 OS=Homo sapiens OX=9606 GN=FLG2 PE=1 SV=1	0	27.321	6	6	80	6	247.9	2		8	3		2	5	2	1	2		1	1	6	6	3	4		1	6	5	1	3	5	1	2		1	1	5	2	1		5	5	2	4	2	3
High	Master Protein	A0A8V8TNI3	Nicastrin OS=Homo sapiens OX=9606 GN=NCSTN PE=4 SV=1	0	8.047	6	3	12	3	74.7										1	1		1	2						3		2		1	1	1	1		1	2
High	Master Protein	O14638	Ectonucleotide pyrophosphatase/phosphodiesterase family member 3 OS=Homo sapiens OX=9606 GN=ENPP3 PE=1 SV=2	0	8.019	6	3	3	3	100.1											3																3
High	Master Protein	F8W1S1	Keratin, type II cytoskeletal 74 OS=Homo sapiens OX=9606 GN=KRT74 PE=1 SV=1	0	9.228	5	3	46	1	59.4	1		1	2	1		2	2		3	1			4	2		1			6	4		6	6		2	1			2	1			1	1		1	2	2
High	Master Protein	P63267	Actin, gamma-enteric smooth muscle OS=Homo sapiens OX=9606 GN=ACTG2 PE=1 SV=1	0	4.069	5	2	6	2	41.9										1	1	1								1					1	1	1	1											1
High	Master Protein	P13473	Lysosome-associated membrane glycoprotein 2 OS=Homo sapiens OX=9606 GN=LAMP2 PE=1 SV=2	0	3.679	5	2	6	2	44.9						1						1			1					1				1				1								1			1
High	Master Protein	P12882	Myosin-1 OS=Homo sapiens OX=9606 GN=MYH1 PE=1 SV=3	0	23.665	4	7	17	4	223				1						1	3	1						1								1	3	1							1				6
High	Master Protein	Q6P1J6	Phospholipase B1, membrane-associated OS=Homo sapiens OX=9606 GN=PLB1 PE=1 SV=3	0	9.822	4	4	10	4	163						3	1	1												1				2												3	1	1	2
High	Master Protein	H7C5W9	P-type Ca(2+) transporter (Fragment) OS=Homo sapiens OX=9606 GN=ATP2A2 PE=1 SV=1	0	8.578	4	3	29	1	102.5				1	1					2	4	4		3				4	2			1	1		3	2	3	3		2					1				2
High	Master Protein	P54802	Alpha-N-acetylglucosaminidase OS=Homo sapiens OX=9606 GN=NAGLU PE=1 SV=2	0	7.389	4	2	3	2	82.2											1			1								1					1			1
High	Master Protein	Q2M2H8	Probable maltase-glucoamylase 2 OS=Homo sapiens OX=9606 GN=MGAM2 PE=1 SV=3	0	31.97	3	6	195	3	277.8	1			12		16	2	10	10	6	10	11	9	8	15	7	9	14	6	7	5	8	8	5	6	3	3	3	3	3	1	1			1	3	1	3	3
High	Master Protein	O14983	Sarcoplasmic/endoplasmic reticulum calcium ATPase 1 OS=Homo sapiens OX=9606 GN=ATP2A1 PE=1 SV=1	0	9.441	3	3	39	1	110.2				2	1	1				3	5	5		2				7	3			2	2		3	3	3	3		2					1	1			2
High	Master Protein	Q14CN2	Calcium-activated chloride channel regulator 4 OS=Homo sapiens OX=9606 GN=CLCA4 PE=1 SV=2	0	4.329	3	2	2	2	101.2											1													1			1
High	Master Protein	Q8N1N4	Keratin, type II cytoskeletal 78 OS=Homo sapiens OX=9606 GN=KRT78 PE=1 SV=2	0	3.546	3	2	7	1	56.8							1													2	1		1	1													1		1
High	Master Protein	P13533	Myosin-6 OS=Homo sapiens OX=9606 GN=MYH6 PE=1 SV=5	0	16.391	2	4	12	2	223.6				1						1	2							1								1	2								1				4
High	Master Protein	Q9UKX2	Myosin-2 OS=Homo sapiens OX=9606 GN=MYH2 PE=1 SV=1	0	14.355	2	4	11	1	222.9				1						2	2							1								2	2								1				3
High	Master Protein	Q02413	Desmoglein-1 OS=Homo sapiens OX=9606 GN=DSG1 PE=1 SV=2	0	6.16	2	2	6	2	113.7							1													1	1		1												2		1
High	Master Protein	P15924	Desmoplakin OS=Homo sapiens OX=9606 GN=DSP PE=1 SV=3	0	10.494	1	3	30	3	331.6			2				2	1				1	1	1	3	2	1	1		1	3	1	2	2				1	1	1		1		2	2		2	1
High	Master Protein	Q8WZ42	Titin OS=Homo sapiens OX=9606 GN=TTN PE=1 SV=4	0	11.008	0	2	7	2	3813.7								1			3	3															1	2										1
High	Master Protein	P20930	Filaggrin OS=Homo sapiens OX=9606 GN=FLG PE=1 SV=3	0	4.397	0	2	12	2	434.9				1			1			1		1		1	1					2		1	1	1		1		1		1					1		1
High	Master Protein	P19835	Bile salt-activated lipase OS=Homo sapiens OX=9606 GN=CEL PE=1 SV=3	0	5.361	3	1	2	1	79.3																																			1
High	Master Protein	A0A0B4J1V0	Immunoglobulin heavy variable 3-15 OS=Homo sapiens OX=9606 GN=IGHV3-15 PE=3 SV=1	0	4.564	9	1	2	1	12.9																								2
High	Master Protein	Q96N76	Urocanate hydratase OS=Homo sapiens OX=9606 GN=UROC1 PE=1 SV=1	0	4.465	2	1	15	1	74.8		1	2	1	2	1			1	2						1									1	1						1	1	1	1	1
High	Master Protein	Q7L5L3	Lysophospholipase D GDPD3 OS=Homo sapiens OX=9606 GN=GDPD3 PE=1 SV=3	0	4.384	4	1	2	1	36.6																																							1
High	Master Protein	P13929	Beta-enolase OS=Homo sapiens OX=9606 GN=ENO3 PE=1 SV=5	0	4.2	3	1	2	1	47												1																1											1
High	Master Protein	P01742	Immunoglobulin heavy variable 1-69 OS=Homo sapiens OX=9606 GN=IGHV1-69 PE=1 SV=2	0	4.006	9	1	20	1	12.7	1		1	1		1	2	1				1		1	2	1	1	1		1	1			1	1			1		1	1			1		1	1	1	1
High	Master Protein	O60635	Tetraspanin-1 OS=Homo sapiens OX=9606 GN=TSPAN1 PE=1 SV=2	0	3.997	5	1	5	1	26.3		1	2		1			1																									1	1				1
High	Master Protein	P23083	Immunoglobulin heavy variable 1-2 OS=Homo sapiens OX=9606 GN=IGHV1-2 PE=1 SV=2	0	3.952	9	1	19	1	13.1	1	1	1	1	1	1	1	1		1		1		1	1	1				1	1		1	1		1		1		1	1		1	1	1	1	1	1	1
High	Master Protein	P03905	NADH-ubiquinone oxidoreductase chain 4 OS=Homo sapiens OX=9606 GN=MT-ND4 PE=1 SV=1	0	3.812	4	1	3	1	51.5											1	2															1	1
High	Master Protein	A0A5F9ZHP6	Aldehyde dehydrogenase family 3 member A2 (Fragment) OS=Homo sapiens OX=9606 GN=ALDH3A2 PE=1 SV=1	0	3.647	9	1	4	1	22.1					3									1																1
High	Master Protein	C9JZR2	Catenin delta-1 OS=Homo sapiens OX=9606 GN=CTNND1 PE=1 SV=2	0	3.614	2	1	3	1	104.8						1	1									1																				1	1
High	Master Protein	E9PLT1	Platelet glycoprotein 4 OS=Homo sapiens OX=9606 GN=CD36 PE=1 SV=1	0	3.54	3	1	2	1	44.7																				1				1
High	Master Protein	A0A087WZW1	Colipase OS=Homo sapiens OX=9606 GN=CLPS PE=1 SV=1	0	3.538	14	1	2	1	10.6				1								1																1
High	Master Protein	A0A0C4DH35	Probable non-functional immunoglobulin heavy variable 3-35 OS=Homo sapiens OX=9606 GN=IGHV3-35 PE=1 SV=1	0	3.47	9	1	8	1	12.8						1		1		1				1	1					1				1		1				1						1		1	1
High	Master Protein	A0A087WW87	Immunoglobulin kappa variable 2-40 OS=Homo sapiens OX=9606 GN=IGKV2-40 PE=3 SV=2	0	3.34	11	1	14	1	13.3				1		1	1	1		2		1			2	1		1		1				1		1		1								1	1	1	1
High	Master Protein	A0A0J9YYH3	Glucose-6-phosphate isomerase (Fragment) OS=Homo sapiens OX=9606 GN=GPI PE=1 SV=1	0	3.307	6	1	1	1	32						1																														1
High	Master Protein	P81605	Dermcidin OS=Homo sapiens OX=9606 GN=DCD PE=1 SV=2	0	3.194	10	1	8	1	11.3										1				1	1	1		1				1	1	1		1				1
High	Master Protein	P01602	Immunoglobulin kappa variable 1-5 OS=Homo sapiens OX=9606 GN=IGKV1-5 PE=1 SV=2	0	3.161	9	1	2	1	12.8								1							1																							1
High	Master Protein	A0A0A0MS15	Immunoglobulin heavy variable 3-49 OS=Homo sapiens OX=9606 GN=IGHV3-49 PE=3 SV=1	0	3.036	9	1	3	1	13																				1				1	1
High	Master Protein	P34059	N-acetylgalactosamine-6-sulfatase OS=Homo sapiens OX=9606 GN=GALNS PE=1 SV=1	0	3.004	3	1	3	1	58														1				2												1
High	Master Protein	O43653	Prostate stem cell antigen OS=Homo sapiens OX=9606 GN=PSCA PE=1 SV=2	0	2.995	9	1	1	1	12																				1
High	Master Protein	A0A2R8Y5S1	Serpin B6 (Fragment) OS=Homo sapiens OX=9606 GN=SERPINB6 PE=1 SV=1	0	2.984	23	1	1	1	6.4																																							1
High	Master Protein	A0A0C4DH36	Probable non-functional immunoglobulin heavy variable 3-38 OS=Homo sapiens OX=9606 GN=IGHV3-38 PE=1 SV=1	0.002	2.885	9	1	1	1	12.8																								1
High	Master Protein	A0A3B3IS47	Collagen alpha-2(IV) chain (Fragment) OS=Homo sapiens OX=9606 GN=COL4A2 PE=1 SV=1	0.002	2.744	9	1	3	1	18.4															1			1					1
High	Master Protein	P50995	Annexin A11 OS=Homo sapiens OX=9606 GN=ANXA11 PE=1 SV=1	0.002	2.644	3	1	1	1	54.4																																							1
High	Master Protein	A0A7P0Z482	Protein MTO1 homolog, mitochondrial OS=Homo sapiens OX=9606 GN=MTO1 PE=1 SV=1	0.002	2.61	3	1	2	1	50.9							1					1																1									1
High	Master Protein	Q08554	Desmocollin-1 OS=Homo sapiens OX=9606 GN=DSC1 PE=1 SV=2	0.002	2.512	2	1	1	1	99.9							1																														1
High	Master Protein	G8JLG2	Corneodesmosin OS=Homo sapiens OX=9606 GN=CDSN PE=1 SV=1	0.002	2.489	3	1	5	1	51.6			1				1													1			1											1	1		1
High	Master Protein	P05089	Arginase-1 OS=Homo sapiens OX=9606 GN=ARG1 PE=1 SV=2	0.002	2.4	4	1	2	1	34.7							1													1																	1
High	Master Protein	H0YNP5	Annexin (Fragment) OS=Homo sapiens OX=9606 GN=ANXA2 PE=1 SV=1	0.002	2.398	6	1	2	1	19.7							1																	1													1
High	Master Protein	C9JA05	Immunoglobulin J chain (Fragment) OS=Homo sapiens OX=9606 GN=JCHAIN PE=1 SV=1	0.002	2.36	17	1	2	1	8.2				1										1																1
High	Master Protein	P31415	Calsequestrin-1 OS=Homo sapiens OX=9606 GN=CASQ1 PE=1 SV=3	0.002	2.337	3	1	1	1	45.1																																			1
High	Master Protein	Q9Y646	Carboxypeptidase Q OS=Homo sapiens OX=9606 GN=CPQ PE=1 SV=1	0.01	2.26	5	1	2	1	51.9											1			1													1			1
Medium	Master Protein	Q5JSZ5	Protein PRRC2B OS=Homo sapiens OX=9606 GN=PRRC2B PE=1 SV=2	0.015	2.176	1	1	4	1	242.8				1												1						1										1
Medium	Master Protein	Q14533	Keratin, type II cuticular Hb1 OS=Homo sapiens OX=9606 GN=KRT81 PE=1 SV=3	0.015	2.159	2	1	1	1	54.9																								1
Medium	Master Protein	P27658	Collagen alpha-1(VIII) chain OS=Homo sapiens OX=9606 GN=COL8A1 PE=1 SV=2	0.015	2.156	1	1	8	1	73.3							1		1	1	1			1				1		2						1	1			1							1
Medium	Master Protein	A0A0B4J1V2	Immunoglobulin heavy variable 2-26 OS=Homo sapiens OX=9606 GN=IGHV2-26 PE=3 SV=1	0.023	2.087	12	1	1	1	13.2										1																1
Medium	Master Protein	D6RAC8	Matrix extracellular phosphoglycoprotein OS=Homo sapiens OX=9606 GN=MEPE PE=1 SV=1	0.032	2.035	3	1	1	1	55.6															1
Medium	Master Protein	H7C3J2	Casein kinase I isoform epsilon (Fragment) OS=Homo sapiens OX=9606 GN=CSNK1E PE=4 SV=2	0.032	2.03	8	1	1	1	28.9															1
Medium	Master Protein	P00558	Phosphoglycerate kinase 1 OS=Homo sapiens OX=9606 GN=PGK1 PE=1 SV=3	0.032	2.005	4	1	1	1	44.6																																							1
Medium	Master Protein	P43632	Killer cell immunoglobulin-like receptor 2DS4 OS=Homo sapiens OX=9606 GN=KIR2DS4 PE=1 SV=2	0.032	1.998	7	1	1	1	33.6																																							1
Medium	Master Protein	A0A087WZZ6	Mucin-1 OS=Homo sapiens OX=9606 GN=MUC1 PE=1 SV=1	0.032	1.955	9	1	1	1	13.3																																							1
Medium	Master Protein	P05109	Protein S100-A8 OS=Homo sapiens OX=9606 GN=S100A8 PE=1 SV=1	0.031	1.952	12	1	1	1	10.8											1																1
Medium	Master Protein	H0Y8K0	Heat shock 70kDa protein 9B (Mortalin-2), isoform CRA_a OS=Homo sapiens OX=9606 GN=HSPA9 PE=1 SV=2	0.031	1.949	3	1	1	1	50
Medium	Master Protein	P07864	L-lactate dehydrogenase C chain OS=Homo sapiens OX=9606 GN=LDHC PE=1 SV=4	0.035	1.903	3	1	1	1	36.3																																							1
Medium	Master Protein	A0A1W2PNW6	Calcium-activated potassium channel subunit alpha-1 OS=Homo sapiens OX=9606 GN=KCNMA1 PE=1 SV=1	0.035	1.86	1	1	3	1	137												1						1		1								1
Medium	Master Protein	O15273	Telethonin OS=Homo sapiens OX=9606 GN=TCAP PE=1 SV=1	0.033	1.85	13	1	1	1	19							1																														1
Medium	Master Protein	Q9H6F2	Trimeric intracellular cation channel type A OS=Homo sapiens OX=9606 GN=TMEM38A PE=1 SV=1	0.05	1.809	3	1	2	1	33.2												1						1										1
Medium	Master Protein	Q9UL42	Paraneoplastic antigen Ma2 OS=Homo sapiens OX=9606 GN=PNMA2 PE=1 SV=2	0.05	1.807	2	1	1	1	41.5																								1
Medium	Master Protein	F5H1D7	cGMP-dependent 3',5'-cyclic phosphodiesterase (Fragment) OS=Homo sapiens OX=9606 GN=PDE2A PE=4 SV=1	0.05	1.791	7	1	2	1	9.6												1																1				1
Medium	Master Protein	Q92538	Golgi-specific brefeldin A-resistance guanine nucleotide exchange factor 1 OS=Homo sapiens OX=9606 GN=GBF1 PE=1 SV=2	0.05	1.773	1	1	1	1	206.3															1
Medium	Master Protein	P01040	Cystatin-A OS=Homo sapiens OX=9606 GN=CSTA PE=1 SV=1	0.048	1.725	18	1	1	1	11																				1
Medium	Master Protein	A0A8I5KRW6	Bridge-like lipid transfer protein family member 1 (Fragment) OS=Homo sapiens OX=9606 GN=BLTP1 PE=1 SV=1	0.05	1.703	1	1	1	1	202.1													1																1
Medium	Master Protein	A0A075B6Q5	Immunoglobulin heavy variable 3-64 OS=Homo sapiens OX=9606 GN=IGHV3-64 PE=3 SV=1	0.049	1.692	14	1	1	1	12.9										1																1
Medium	Master Protein	Q92805	Golgin subfamily A member 1 OS=Homo sapiens OX=9606 GN=GOLGA1 PE=1 SV=3	0.049	1.679	2	1	3	1	88.1					2	1																														1
Low	Master Protein	Q9BW61	DET1- and DDB1-associated protein 1 OS=Homo sapiens OX=9606 GN=DDA1 PE=1 SV=1	0.057	1.677	18	1	1	1	11.8																	1
Low	Master Protein	A0A494C0U4	protein-tyrosine-phosphatase OS=Homo sapiens OX=9606 GN=PTPRZ1 PE=1 SV=1	0.057	1.662	0	1	9	1	227.6						1		1				1		1	1		1	1		1			1					1		1						1		1
Low	Master Protein	A0A0A0MQX1	Unconventional myosin-X OS=Homo sapiens OX=9606 GN=MYO10 PE=1 SV=1	0.057	1.62	0	1	1	1	238.4												1																1
Low	Master Protein	P40879	Chloride anion exchanger OS=Homo sapiens OX=9606 GN=SLC26A3 PE=1 SV=1	0.056	1.608	1	1	1	1	84.5		1																															1
Low	Master Protein	P25311	Zinc-alpha-2-glycoprotein OS=Homo sapiens OX=9606 GN=AZGP1 PE=1 SV=2	0.056	1.605	5	1	1	1	34.2															1
Low	Master Protein	A0A8V8TMM9	Telomerase Cajal body protein 1 OS=Homo sapiens OX=9606 GN=WRAP53 PE=4 SV=1	0.056	1.603	13	1	1	1	19.4											1																1
Low	Master Protein	H0YNN4	Complex I intermediate-associated protein 30, mitochondrial (Fragment) OS=Homo sapiens OX=9606 GN=NDUFAF1 PE=1 SV=2	0.056	1.601	4	1	1	1	40.4										1																1
Low	Master Protein	A0A669KBE3	RBR-type E3 ubiquitin transferase (Fragment) OS=Homo sapiens OX=9606 GN=PRKN PE=1 SV=1	0.056	1.594	2	1	4	1	39.7									1							1						1	1
Low	Master Protein	H7C106	Reticulon (Fragment) OS=Homo sapiens OX=9606 GN=RTN4 PE=1 SV=1	0.057	1.538	4	1	2	1	22.8												1																1											1
Low	Master Protein	B7Z4Y8	Butyrophilin-like protein 9 OS=Homo sapiens OX=9606 GN=BTNL9 PE=1 SV=1	0.056	1.513	16	1	2	1	27.5									1													1
Low	Master Protein	A0A0G2JL76	Choline transporter-like protein OS=Homo sapiens OX=9606 GN=SLC44A4 PE=1 SV=1	0.056	1.507	1	1	3	1	70.7		1	1																														1	1					1
Low	Master Protein	A8K727	Pleckstrin homology domain-containing family A member 2 OS=Homo sapiens OX=9606 GN=PLEKHA2 PE=1 SV=1	0.056	1.506	3	1	1	1	47.2																																			1
Low	Master Protein	P05026	Sodium/potassium-transporting ATPase subunit beta-1 OS=Homo sapiens OX=9606 GN=ATP1B1 PE=1 SV=1	0.056	1.482	4	1	1	1	35			1																															1
Low	Master Protein	P23526	Adenosylhomocysteinase OS=Homo sapiens OX=9606 GN=AHCY PE=1 SV=4	0.056	1.459	2	1	1	1	47.7																					1
Low	Master Protein	J3KRH4	Inositol-3-phosphate synthase 1 (Fragment) OS=Homo sapiens OX=9606 GN=ISYNA1 PE=1 SV=1	0.055	1.424	6	1	1	1	19.5					1
Low	Master Protein	H7C1S2	Bifunctional purine biosynthesis protein ATIC (Fragment) OS=Homo sapiens OX=9606 GN=ATIC PE=1 SV=1	0.055	1.414	5	1	6	1	26						1							1						1		1	1			1				1							1
Low	Master Protein	F8WAR1	Raftlin OS=Homo sapiens OX=9606 GN=RFTN1 PE=1 SV=1	0.055	1.4	21	1	1	1	13.4																						1
Low	Master Protein	Q6P4F7	Rho GTPase-activating protein 11A OS=Homo sapiens OX=9606 GN=ARHGAP11A PE=1 SV=2	0.055	1.37	1	1	11	1	113.8										1		1	1		1		1					2	1		1	1		1	1			1			1
										sum PSMs	674	201	908	1430	677	1798	1508	6200	1081	7754	2268	2601	1243	8292	5293	1128	1221	2011	1262	3134	1218	2096	4324	2326	1257
										number prot	54	44	80	96	69	102	98	106	75	105	116	108	74	122	108	80	77	101	70	125	85	106	85	125	80
										mean PSMperProt	12.48	4.57	11.35	14.9	9.81	17.63	15.39	58.49	14.41	73.85	19.55	24.08	16.8	67.97	49.01	14.1	15.86	19.91	18.03	25.07	14.33	19.77	50.87	18.61	15.71
[truncated: 11 more columns]
