# Supplementary material for: Human milk oligosaccharide 2’-fucosyllactose protects against high-fat diet-induced obesity by changing intestinal mucus production, composition and degradation linked to changes in gut microbiota and faecal proteome profiles in mice
Source: Gut. 2024 May 13;73(10):1632–49. doi: 10.1136/gutjnl-2023-330301 (PMC11420753; doi:10.1136/gutjnl-2023-330301)
Supplement: Supplementary data [file gutjnl-2023-330301supp008.xlsx]

## Sheet: t_test_NormvsOb_norm5
Obese vs lean humans
All significantly increased in obese humans
	t.stat	p.value	-LOG10(p)	FDR
ACE	-5.3364	2.0329e-05	4.6919	0.0025614
ALPL	-4.4415	0.00018732	3.7274	0.0109
TREH	-4.2477	0.00030368	3.5176	0.0109
CELA2A	-4.1675	0.00037092	3.4307	0.0109
ALPI	-4.1057	0.00043255	3.364	0.0109
CDH1	-3.8039	0.00091441	3.0389	0.016537
ITLN2	-3.802	0.00091874	3.0368	0.016537
SI	-3.6184	0.0014436	2.8406	0.022736
SELENBP1	-3.5476	0.0017164	2.7654	0.02284
CPA1	-3.5076	0.0018927	2.7229	0.02284
FCGBP	-3.4862	0.0019939	2.7003	0.02284
NAALADL1	-3.3564	0.0027324	2.5635	0.026608
ITLN1	-3.3544	0.0027452	2.5614	0.026608
SERPINA3	-3.0787	0.0053089	2.275	0.045729
CPB1	-3.068	0.005444	2.2641	0.045729
MGAM	-2.9868	0.0065907	2.1811	0.04909
MGAM2	-2.9847	0.0066232	2.1789	0.04909
