# Supplementary material for: Human milk oligosaccharide 2’-fucosyllactose protects against high-fat diet-induced obesity by changing intestinal mucus production, composition and degradation linked to changes in gut microbiota and faecal proteome profiles in mice
Source: Gut. 2024 May 13;73(10):1632–49. doi: 10.1136/gutjnl-2023-330301 (PMC11420753; doi:10.1136/gutjnl-2023-330301)
Supplement: Supplementary data [file gutjnl-2023-330301supp009.xlsx]

## Sheet: Functional Annotation Clusterin
_x000B_Annotation Cluster 1	Enrichment Score: 3.0464405668129175
Category	Term	Count	%	PValue	Genes	List Total	Pop Hits	Pop Total	Fold Enrichment	Bonferroni	Benjamini	FDR
GOTERM_MF_DIRECT	GO:0004180~carboxypeptidase activity	4	23.5294	8.70694e-07	CPA1, CPB1, ACE, NAALADL1	17	23	18913	193.483	5.13696e-05	5.13709e-05	4.61468e-05
UP_SEQ_FEATURE	ACT_SITE:Proton donor/acceptor	4	23.5294	7.35142e-05	CPA1, CPB1, TREH, NAALADL1	17	107	20516	45.1149	0.010094	0.00253624	0.00238921
GOTERM_BP_DIRECT	GO:0006508~proteolysis	5	29.4118	0.000180692	CELA2A, CPA1, CPB1, ACE, NAALADL1	15	418	19357	15.4362	0.0235712	0.0238513	0.0238513
UP_KW_MOLECULAR_FUNCTION	KW-0482~Metalloprotease	4	23.5294	0.000473002	CPA1, CPB1, ACE, NAALADL1	13	157	11735	22.9985	0.00566128	0.00189201	0.00189201
UP_KW_MOLECULAR_FUNCTION	KW-0121~Carboxypeptidase	3	17.6471	0.00066026	CPA1, CPB1, ACE	13	38	11735	71.2652	0.00789441	0.00198078	0.00198078
UP_KW_MOLECULAR_FUNCTION	KW-0645~Protease	5	29.4118	0.00177148	CELA2A, CPA1, CPB1, ACE, NAALADL1	13	552	11735	8.17656	0.0210518	0.00425154	0.00425154
GOTERM_MF_DIRECT	GO:0008270~zinc ion binding	5	29.4118	0.0051933	CPA1, CPB1, ACE, ALPI, NAALADL1	17	870	18913	6.39385	0.264499	0.0510675	0.0458742
UP_KW_LIGAND	KW-0479~Metal-binding	9	52.9412	0.056209	CPA1, CPB1, ACE, CDH1, ITLN1, ALPL, ITLN2, ALPI, NAALADL1	10	3978	6850	1.54977	0.293268	0.168627	0.140523
UP_KW_LIGAND	KW-0862~Zinc	6	35.2941	0.204502	CPA1, CPB1, ACE, ALPL, ALPI, NAALADL1	10	2525	6850	1.62772	0.746583	0.307015	0.255846
Annotation Cluster 2	Enrichment Score: 2.6372823852586604
Category	Term	Count	%	PValue	Genes	List Total	Pop Hits	Pop Total	Fold Enrichment	Bonferroni	Benjamini	FDR
GOTERM_CC_DIRECT	GO:0031225~anchored component of membrane	4	23.5294	7.90115e-05	TREH, ITLN1, ALPL, ALPI	17	110	20587	44.0364	0.00394294	0.00131686	0.00126418
UP_KW_PTM	KW-0336~GPI-anchor	4	23.5294	0.000508283	TREH, ITLN1, ALPL, ALPI	17	142	14104	23.3703	0.00456526	0.00254142	0.00254142
UP_SEQ_FEATURE	LIPID:GPI-anchor amidated serine	3	17.6471	0.000887597	TREH, ITLN1, ALPL	17	57	20516	63.517	0.115332	0.0244977	0.0230775
UP_SEQ_FEATURE	PROPEP:Removed in mature form	3	17.6471	0.0213764	TREH, ALPL, ALPI	17	293	20516	12.3566	0.949305	0.245829	0.231578
UP_KW_PTM	KW-0449~Lipoprotein	4	23.5294	0.0854361	TREH, ITLN1, ALPL, ALPI	17	936	14104	3.5455	0.552362	0.142393	0.142393
Annotation Cluster 3	Enrichment Score: 2.5531775352164314
Category	Term	Count	%	PValue	Genes	List Total	Pop Hits	Pop Total	Fold Enrichment	Bonferroni	Benjamini	FDR
UP_SEQ_FEATURE	DOMAIN:P-type 1	3	17.6471	3.41824e-06	MGAM2, MGAM, SI	17	4	20516	905.118	0.000471607	0.000235859	0.000222186
UP_SEQ_FEATURE	DOMAIN:P-type 2	3	17.6471	3.41824e-06	MGAM2, MGAM, SI	17	4	20516	905.118	0.000471607	0.000235859	0.000222186
GOTERM_MF_DIRECT	GO:0004558~alpha-1,4-glucosidase activity	3	17.6471	1.00449e-05	MGAM2, MGAM, SI	17	6	18913	556.265	0.000592478	0.000296326	0.000266191
KEGG_PATHWAY	hsa00500:Starch and sucrose metabolism	4	23.5294	1.24957e-05	MGAM2, MGAM, SI, TREH	12	36	8205	75.9722	0.00034982	0.000349879	0.000312392
INTERPRO	IPR000322:Glycoside hydrolase, family 31	3	17.6471	1.37264e-05	MGAM2, MGAM, SI	17	7	19139	482.496	0.000590064	0.000505421	0.000505421
INTERPRO	IPR000519:P-type trefoil	3	17.6471	2.3508e-05	MGAM2, MGAM, SI	17	9	19139	375.275	0.00101034	0.000505421	0.000505421
SMART	SM00018:PD	3	17.6471	3.00007e-05	MGAM2, MGAM, SI	11	9	10374	314.364	0.000389938	0.000390009	0.000390009
INTERPRO	IPR011013:Galactose mutarotase-like domain	3	17.6471	5.08346e-05	MGAM2, MGAM, SI	17	13	19139	259.805	0.00218356	0.00072863	0.00072863
UP_KW_MOLECULAR_FUNCTION	KW-0326~Glycosidase	4	23.5294	7.16874e-05	MGAM2, MGAM, SI, TREH	13	83	11735	43.5032	0.000859909	0.000430124	0.000430124
INTERPRO	IPR013780:Glycosyl hydrolase, family 13, all-beta	3	17.6471	0.000194377	MGAM2, MGAM, SI	17	25	19139	135.099	0.00832419	0.00208955	0.00208955
GOTERM_MF_DIRECT	GO:0004553~hydrolase activity, hydrolyzing O-glycosyl compounds	3	17.6471	0.000250399	MGAM2, MGAM, SI	17	28	18913	119.2	0.0146668	0.00492451	0.00442371
KEGG_PATHWAY	hsa00052:Galactose metabolism	3	17.6471	0.000743919	MGAM2, MGAM, SI	12	31	8205	66.1694	0.0206219	0.0104149	0.00929899
INTERPRO	IPR017853:Glycoside hydrolase, superfamily	3	17.6471	0.000948199	MGAM2, MGAM, SI	17	55	19139	61.4086	0.0399711	0.00815451	0.00815451
KEGG_PATHWAY	hsa04973:Carbohydrate digestion and absorption	3	17.6471	0.00170928	MGAM2, MGAM, SI	12	47	8205	43.6436	0.0467718	0.0159533	0.014244
UP_KW_PTM	KW-0765~Sulfation	3	17.6471	0.0018569	MGAM2, MGAM, SI	17	57	14104	43.6656	0.0165885	0.00618967	0.00618967
KEGG_PATHWAY	hsa01100:Metabolic pathways	7	41.1765	0.00845385	SELENBP1, MGAM2, MGAM, SI, TREH, ALPL, ALPI	12	1541	8205	3.10594	0.211572	0.0394513	0.0352244
UP_KW_DOMAIN	KW-0735~Signal-anchor	4	23.5294	0.0111189	MGAM2, MGAM, SI, NAALADL1	16	464	14500	7.8125	0.0543719	0.0277972	0.0277972
GOTERM_MF_DIRECT	GO:0030246~carbohydrate binding	3	17.6471	0.0123438	MGAM2, MGAM, SI	17	202	18913	16.5227	0.519447	0.0910358	0.0817779
GOTERM_CC_DIRECT	GO:0016324~apical plasma membrane	3	17.6471	0.0340484	MGAM, SI, NAALADL1	17	378	20587	9.61111	0.823084	0.340484	0.326865
UP_SEQ_FEATURE	TRANSMEM:Helical; Signal-anchor for type II membrane protein	3	17.6471	0.0379956	MGAM, SI, NAALADL1	17	400	20516	9.05118	0.995231	0.374528	0.352817
UP_SEQ_FEATURE	TOPO_DOM:Lumenal	3	17.6471	0.0914136	MGAM2, MGAM, SI	17	657	20516	5.51061	0.999998	0.788443	0.742736
UP_SEQ_FEATURE	TOPO_DOM:Cytoplasmic	6	35.2941	0.162922	MGAM2, MGAM, ACE, CDH1, SI, NAALADL1	17	3826	20516	1.89256	1	1	0.948905
GOTERM_CC_DIRECT	GO:0016021~integral component of membrane	6	35.2941	0.413521	MGAM2, MGAM, ACE, CDH1, SI, NAALADL1	17	5395	20587	1.3468	1	1	0.979592
UP_KW_DOMAIN	KW-0677~Repeat	6	35.2941	0.633151	FCGBP, MGAM2, MGAM, ACE, CDH1, SI	16	5004	14500	1.08663	0.993356	0.798512	0.798512
UP_SEQ_FEATURE	TRANSMEM:Helical	5	29.4118	0.63654	MGAM2, MGAM, ACE, CDH1, SI	17	5371	20516	1.12346	1	1	0.948905
UP_SEQ_FEATURE	TOPO_DOM:Extracellular	3	17.6471	0.688878	ACE, CDH1, NAALADL1	17	2931	20516	1.23523	1	1	0.948905
UP_KW_DOMAIN	KW-1133~Transmembrane helix	6	35.2941	0.788732	MGAM2, MGAM, ACE, CDH1, SI, NAALADL1	16	5837	14500	0.931557	0.999579	0.798512	0.798512
UP_KW_DOMAIN	KW-0812~Transmembrane	6	35.2941	0.798512	MGAM2, MGAM, ACE, CDH1, SI, NAALADL1	16	5900	14500	0.92161	0.999668	0.798512	0.798512
UP_SEQ_FEATURE	REGION:Disordered	7	41.1765	0.995764	SELENBP1, MGAM2, MGAM, ACE, CDH1, SI, TREH	17	13638	20516	0.619428	1	1	0.995764
Annotation Cluster 4	Enrichment Score: 2.517085811099706
Category	Term	Count	%	PValue	Genes	List Total	Pop Hits	Pop Total	Fold Enrichment	Bonferroni	Benjamini	FDR
GOTERM_BP_DIRECT	GO:0006508~proteolysis	5	29.4118	0.000180692	CELA2A, CPA1, CPB1, ACE, NAALADL1	15	418	19357	15.4362	0.0235712	0.0238513	0.0238513
UP_SEQ_FEATURE	PROPEP:Activation peptide	3	17.6471	0.00157137	CELA2A, CPA1, CPB1	17	76	20516	47.6378	0.195086	0.0271061	0.0255347
UP_KW_MOLECULAR_FUNCTION	KW-0645~Protease	5	29.4118	0.00177148	CELA2A, CPA1, CPB1, ACE, NAALADL1	13	552	11735	8.17656	0.0210518	0.00425154	0.00425154
KEGG_PATHWAY	hsa04972:Pancreatic secretion	3	17.6471	0.00782356	CELA2A, CPA1, CPB1	12	102	8205	20.1103	0.197418	0.0394513	0.0352244
KEGG_PATHWAY	hsa04974:Protein digestion and absorption	3	17.6471	0.00797265	CELA2A, CPA1, CPB1	12	103	8205	19.915	0.200788	0.0394513	0.0352244
UP_KW_PTM	KW-0865~Zymogen	3	17.6471	0.0251725	CELA2A, CPA1, CPB1	17	220	14104	11.3134	0.205032	0.0503451	0.0503451
Annotation Cluster 5	Enrichment Score: 1.9299266975619624
Category	Term	Count	%	PValue	Genes	List Total	Pop Hits	Pop Total	Fold Enrichment	Bonferroni	Benjamini	FDR
UP_SEQ_FEATURE	CARBOHYD:N-linked (GlcNAc...) asparagine	12	70.5882	6.0985e-05	FCGBP, SERPINA3, MGAM2, MGAM, ACE, CDH1, SI, TREH, ITLN1, ALPL, ALPI, NAALADL1	17	4376	20516	3.30939	0.00838088	0.00253624	0.00238921
UP_KW_PTM	KW-0325~Glycoprotein	12	70.5882	0.00426647	FCGBP, SERPINA3, MGAM2, MGAM, ACE, CDH1, SI, TREH, ITLN1, ALPL, ALPI, NAALADL1	17	4733	14104	2.10348	0.0377494	0.0106662	0.0106662
UP_KW_CELLULAR_COMPONENT	KW-1003~Cell membrane	9	52.9412	0.012997	MGAM, ACE, CDH1, SI, TREH, ITLN1, ALPL, ALPI, NAALADL1	17	3904	17662	2.3951	0.122626	0.0649849	0.0649849
GOTERM_CC_DIRECT	GO:0016020~membrane	7	41.1765	0.0547154	SELENBP1, MGAM, ACE, CDH1, TREH, ALPL, NAALADL1	17	3739	20587	2.26718	0.940003	0.390824	0.375191
GOTERM_CC_DIRECT	GO:0005886~plasma membrane	8	47.0588	0.0935594	MGAM, ACE, CDH1, SI, TREH, ALPL, ALPI, NAALADL1	17	5334	20587	1.81627	0.992638	0.584746	0.561356
UP_KW_CELLULAR_COMPONENT	KW-0472~Membrane	11	64.7059	0.152093	SELENBP1, MGAM2, MGAM, ACE, CDH1, SI, TREH, ITLN1, ALPL, ALPI, NAALADL1	17	8224	17662	1.38963	0.80792	0.506976	0.506976
